# 1 Quantitative Analysis of Drug Efficacy on *C. elegans* Models for

## 2 Neuromuscular Diseases

3 Samuel Sofela<sup>1,2</sup>, Sarah Sahloul<sup>1</sup>, Yong-Ak Song<sup>1,2</sup>

4  
5 <sup>1</sup>Division of Engineering, New York University Abu Dhabi, United Arab Emirates

6 <sup>2</sup>Tandon School of Engineering, New York University, USA

7  
8 **Keywords:** *C. elegans*, drug screening, biophysical phenotyping, neuromuscular diseases.

### 9 10 Abstract

11 *Caenorhabditis elegans* has emerged as a powerful model organism for drug screening due to  
12 its cellular simplicity, genetic amenability and homology to humans combined with its small  
13 size and low cost. Currently, high-throughput drug screening assays are mostly based on  
14 image-based phenotyping not exploiting key locomotory parameters of this multicellular  
15 model with muscles such as its thrashing force, a critical parameter when screening drugs for  
16 muscle-related diseases. In this study, we demonstrated the use of a micropillar-based force  
17 assay chip in combination with an imaging assay to evaluate the efficacy of various drugs  
18 currently used in treatment of neuromuscular diseases. Using this two-dimensional approach,  
19 we showed that the force assay was generally more sensitive in measuring efficacy of drug  
20 treatment in Duchenne Muscular Dystrophy and Parkinson's Disease mutant worms as well  
21 as partly in Amyotrophic Lateral Sclerosis model. These results underline the potential of our

22 force assay chip in screening of potential drug candidates for the treatment of neuromuscular  
23 diseases when combined with an imaging assay in a two-dimensional analysis approach.

24

## 25 **Introduction**

26 Neuromuscular diseases consist of a diverse group of medical conditions that mainly affect  
27 the one or more parts of the neuromuscular unit such as skeletal muscle, motor neurons,  
28 peripheral nerves and neuromuscular synapses[1]. These diseases which can be hereditary or  
29 acquired, affect as many as 1 in 3,000 people[2] and can be attributed to neurodegenerative  
30 diseases like Parkinson's disease (PD)[3] and Duchenne muscular dystrophies (DMD)[4]. A  
31 common effect of most neuromuscular disorders is locomotion due to muscle wasting,  
32 weakness and disuse[5].

33 *Caenorhabditis elegans* has been utilized as a relevant disease model to explain the intricacies  
34 of cellular processes and in the search for drugs for treatment of neuromuscular diseases[6].  
35 In modeling of neuromuscular diseases, it is important that neuronal cellular functions and  
36 muscle structure are well conserved if drugs are to be translated to humans. As such, several  
37 drugs used in to treat neuromuscular and neurodegenerative diseases have proven effective  
38 in phenotyping *C. elegans* for validation[7–9].

39 Of particular interest is the locomotory mechanism of the *C. elegans*, which is involved in  
40 most of the worm's behavior, and has been used in genetic analysis to score phenotypes  
41 linked to neuromodulatory and structural defects[10]. The locomotory dynamics in *C. elegans*  
42 is not only derived from a combination of neuromuscular control systems but also from the  
43 coordination of internal control and physical properties of the worm[11,12]. Its locomotory  
44 behavior has mostly been quantified through measuring locomotive parameters, such as

45 worm velocity, thrashing frequency, and number of bends[13]. While these parameters have  
46 proven beneficial, they are indirect phenotypes and provide a different aspect of worm  
47 physiology compared to force assays[14].

48 Due to the similar length scale, microfluidics technology has emerged as a powerful platform  
49 in the phenotyping of *C. elegans*[15–17]. Cornaglia et. al reported a multi-functional  
50 microfluidic platform for automated worm culture, immobilization and long-term imaging of  
51 Amyotrophic Lateral Sclerosis (ALS) and Huntington disease mutant worms[18]. In another  
52 study[19], long-term swimming exercise was used as a behavioral phenotype to understand  
53 the impact of exercise on locomotory performance in Alzheimer’s and Huntington’s disease  
54 model animals. Salam et al[20] utilized electrotaxis response of *C. elegans* to analyze the  
55 worm’s response to neurotoxic and neuroprotective compounds in modeling PD. The  
56 aforementioned assays have contributed to better understanding and assessment of drug  
57 treatments for neuromuscular and neurodegenerative diseases. However, there was no  
58 direct characterization of muscle strength as the ability to generate the maximal amount of  
59 muscle force which can be correlated with clinical studies in humans. To this end, there have  
60 been several studies that quantified the force exerted by body wall muscles using elastomeric  
61 micropillars[21–24], however, only Hewitt et al used a neuromuscular disease model[14]. In  
62 their study, they reported the use of their micropillar-based force measurement system,  
63 called Nemaflex, to study the muscle strength of DMD mutant worms before and after drug  
64 treatment. Using their device with free-moving worms, they were able to show that adult *dys-*  
65 *1(eg33)* mutants were weaker than wild-type worms while *dys-1(cx18)* mutants exhibited  
66 similar muscle force as wild-type worms. While these studies successfully quantified the  
67 muscle force, the use of free-moving worms could introduce complexities for tracking the

68 worm which could pose major challenges for multiplexing. Although tracking of free-moving  
69 worms in micropillar array has been demonstrated[25], its throughput is still limited.  
70 In this study, we performed a two-dimensional analysis of drug efficacy using *C. elegans* as  
71 neuromuscular disease models. For the first-dimensional analysis, we utilized a microfluidic  
72 chip with an integrated array of elastomeric micropillars to partially immobilize a *C. elegans*  
73 and quantitatively measure its thrashing force before and after drug treatment. This thrashing  
74 force assay device in polydimethylsiloxane (PDMS) allowed us to quantify the force exerted  
75 by partially immobilized worms in various developmental stages independent of their  
76 trapping orientation[24]. To evaluate the muscle strength degradation in neuromuscular  
77 disease (NMD) model worms, we used three mutant worms: DMD (LS587), ALS (AM725), and  
78 Parkinson's Disease (NL5901). Using these models in the force assay device, we examined the  
79 efficacy of six representative drugs for the treatment of neuromuscular diseases. In the  
80 second-dimensional analysis, we performed a quantitative image analysis of the protein  
81 aggregation and morphological studies of the body wall muscles before and after drug  
82 treatment on an agarose pad following standard protocol and validated the force  
83 measurement data. In this way, we could quantify the efficacy of the drugs on the muscle  
84 force and corroborate the force data with morphological studies of the protein aggregation  
85 and actin filament structures in the body wall muscles for validation. With its simple and  
86 scalable design, our force assay chip has facilitated a highly quantitative and sensitive  
87 biophysical phenotyping of *C. elegans* without biases to assess efficacy of various drugs on  
88 muscle strength.

89

## 90 **Materials and Methods**

91 *Worm Strain*

92 Three transgenic strains were used in this study to model neuromuscular diseases: LS587 (*dys-*  
93 *1(cx18) I; hlh-1(cc561) II*) as DMD model, AM725 (*rmIs290[unc-54p::Hsa-sod-1(127X)::YFP]*)  
94 as ALS model, and NL5901 (*[unc54p::alphasynuclein: :YFP + unc-119(+)]*) as PD model. All  
95 strains were obtained Caenorhabditis Genetics Center (University of Minnesota, Minnesota,  
96 MN). LS587 strain was maintained at 15°C, while AM725 and NL5901 were maintained at 20  
97 °C. Worms were grown using the standard nematode growth medium seeded with  
98 *Escherichia coli* [26]. Sodium hypochlorite treatment was done to obtain embryos from gravid  
99 adult animals, eggs were allowed to hatch at room temperature except for LS587 strain which  
100 was kept at 15°C.

101

102 *Drug Treatment and Culture*

103 For each strain, two different drugs were evaluated. For the DMD model, LS587, two common  
104 drugs were tested: prednisone and melatonin. Each drug was added to the Nematode Growth  
105 Media (NGM) with a final concentration of 0.37mM prednisone diluted in 0.062% DMSO and  
106 1 mM melatonin. Both drug concentrations were selected based on previous drug treatment  
107 study on *C. elegans* [14]. Worms grown on NGM mixed with the required drug starting from  
108 L1 stage for ~3 days and 17 hours at 15°C until L4 stage, and for 4 days and ~17 hours at 15°C  
109 until young adult stage. Control plates for prednisone contained 0.062% DMSO.

110 ALS model worms were treated with doxycycline and riluzole at two different concentrations.  
111 Doxycycline was added to the NGM plates to obtain a final concentration of 10.5 µM and 32  
112 µM. Worms were cultured at 20 °C. The control group was kept for ~2 days and 4 hours to  
113 reach young adult stage. The worms treated with 10.5 µM doxycycline required additional ~5  
114 hours and those treated with 32 µM doxycycline additional ~9 hours compared to the control

115 group. This delay in growth is known as a side effect by doxycycline[18]. The higher dosage of  
116 doxycycline (32  $\mu$ M) was tested on SJ4100 and showed a decrease in the average size of  
117 aggregates[18]. For comparison, we also selected a lower dosage of the drug as well. Worms  
118 treated with riluzole were maintained at 20 °C until L4 stage and then moved to liquid culture,  
119 the S basal medium containing the drug, until reaching young adult stage. Both the drug  
120 treated group and the control group contained 0.5% DMSO which was used as a solvent for  
121 riluzole. The control sample was incubated for ~1 day and 21 hours while for drug treated  
122 ones at 30  $\mu$ M and 100  $\mu$ M were incubated by ~2 hours longer before it was shifted to liquid  
123 culture for drug treatment. In liquid culture, both the control and 30  $\mu$ M riluzole treated  
124 worms were incubated for ~1 day with shaking at 100 rpm in 20 °C in 96 well plate, while 100  
125  $\mu$ M riluzole treated ones required additional incubation by ~3 hours to reach young adult  
126 stage[13]. Riluzole treatment was shifted to liquid media in S basal due to the low solubility  
127 of riluzol in NGM similar to the study by Ikenaka et al.[13].  
128 Levodopa and pramipexole were used to treat NL5901. Levodopa was mixed with NGM plates  
129 for the final concentrations of 0.7 mM and 2 mM with 0.5% DMSO[27]. The control group also  
130 was treated with 0.5% DMSO. Worms were maintained at 20 °C from L1 stage until young  
131 adult for ~2 days and 5 hours. Pramipexole was prepared in M9 buffer and spread on top of  
132 the NGM plates with a final concentration of 2.5 mM and 5 mM. 5mM pramipexole has been  
133 reported in the treatment of *C. elegans*[28], and the lower dosage of 2.5 mM was used  
134 because excess amounts of pramipexole may result in over stimulation of *C. elegans*. Worms  
135 were grown for ~2 days and 5 hours at 20 °C until reaching young adult stage. A summary of  
136 the culture methods and drug treatments can be found in S1 Table.

137

138 *Device Fabrication*

139 The microfluidic device used in this paper was fabricated by conventional soft lithography  
140 technique using polydimethylsiloxane (PDMS). It was reported in our previous paper (S1  
141 Fig)[24]. Briefly, a silicon wafer was used as master mold and patterned using  
142 photolithography with the aid of a chrome mask. The mask was developed using a mask writer  
143 (Heidelberg Instruments DW66+). Sequel to patterning the silicon wafer, it was etched using  
144 deep reactive ion etching thereby creating holes and trenches that served as molds for the  
145 micropillars and channels respectively. The difference in heights between the channel and  
146 the micropillars was due to the loading effect.

147 To develop the microfluidic devices, PDMS polymer was prepared by mixing base and curing  
148 agents in a 10:1 weight ratio. The mixture was then degassed in a vacuum jar for 10 min, drop-  
149 casted over the silicon master mold and cured in an oven for ~4 hours at 70 °C. The cured  
150 PDMS replica was peeled off the silicon mold and carefully bonded on a glass slide after  
151 treatment with oxygen plasma for 2 min. Each device had an array of 2 x 12 micropillar array  
152 with 17.5 – 23.5  $\mu\text{m}$  in diameter, 36  $\mu\text{m}$  in height and channel depth of 45  $\mu\text{m}$ . S1 Fig  
153 summarizes the geometrical details of each device and disease model applied to.

154

#### 155 *Image Acquisition and analysis*

156 For the force assay, images and videos of the micropillar deflection due to worm thrashing  
157 were captured using an inverted bright-field microscope (Nikon® Eclipse Ti-U) equipped with  
158 a CCD camera (Andor® Clara E). The video of each worm was captured for 15 seconds at 100  
159 fps. Video analysis was performed using Kinovea® and deflections were measured every 10  
160 frames (150 data points per micropillar) resulting in a total of 3600 data points per worm.  
161 Further details of the experimental set up can be found in our work[24].

162 The double mutant LS587 strain muscle morphology was examined with phalloidin  
163 (ThermoFisher, A12379) to stain actin filaments and evaluated closely under 60X immersion  
164 oil objective[24]. For NL5901 and AM725 protein aggregation was assessed through imaging  
165 using 3% agarose pads with 10mM levamisole then worms were imaged using 10X  
166 magnification with 10ms exposure time[29]. All imaging was carried out using FITC filter under  
167 inverted microscope (Nikon® Eclipse Ti-E) equipped with a CCD camera (Andor® iXon Ultra  
168 897 EMCCD).

169

#### 170 *Thrashing Force Measurement*

171 The thrashing force of the worms were measured using elastomeric micropillars incorporated  
172 within a microfluidic device. The microfluidic device, with the aid of a notch, partially  
173 immobilizes a part (head of tail) of the worm while the remainder of the body is allowed to  
174 thrash and consequently deflecting the micropillars. The deflection of the micropillars was  
175 captured and recorded for 15 secs. Due to the sensitivity of the micropillars, we observed  
176 non-linear deflection of same which implied that the conventional Timoshenko beam theory  
177 could not be used for the calculation of forces. To calculate the thrashing force from non-  
178 linear displacements, we used our custom finite element model (FEM) which we have  
179 previously reported[24]. The maximum deflection of each micropillar was measured and the  
180 average was taken for the number of worms used. The finite element model was developed  
181 using ABAQUS/CAE 2016. The geometry was meshed using 20-noded quadratic hexahedral  
182 elements and analysis was performed with ABAQUS/Standard 2016 using a full-Newton direct  
183 solver. The effect of the PDMS soft substrate could be neglected, since the study focuses on  
184 the relative changes in the thrashing force only. Comparative analysis of the thrashing force  
185 was done using two-way ANOVA statistical technique.



## 186 *Statistical Analysis*

187 For comparison of thrashing force data, two-way ANOVA with Tukey's multiple comparison  
188 was used. Changes in actin filament morphology of DMD worm samples were analyzed using  
189 chi-squared method. Other statistical analyses on the fluorescent image data were performed  
190 using student t-test.

## 191 **Results**

### 192 *Two-dimensional analysis protocol*

193 The general workflow of the two-dimensional analysis is shown in Fig 1A. Once cultured on  
194 agarose plate and washed off using M9 solution, worms were split into two fractions. One  
195 fraction of the worm suspension was used for thrashing force analysis and the other fraction  
196 for image analysis. To quantify thrashing force, we used the PDMS-based micropillar force  
197 assay device shown in Fig 1B, which used a constriction channel to partially immobilize the  
198 worm. This partial immobilization circumvented vision-based tracking and introduced  
199 mechanical stimulation, induced by the walls of the constriction channel, on the head of the  
200 worm. The remainder of the worm thrashed on the micropillar array and the deflection was  
201 captured with a microscope (Fig 1C). Using a custom non-linear finite element model (see  
202 details in Methods section) the force exerted by the worms on each micropillar was calculated  
203 (Fig 1D). We evaluated the thrashing force exerted by DMD (LS587), ALS (AM725) and  
204 Parkinson's Disease (NL5901) mutant worms compared to wild-type N2. The average  
205 thrashing forces were  $25.5 \pm 0.92 \mu\text{N}$  (mean  $\pm$  standard error of the mean,  $n = 27$ ),  $7.9 \pm 0.49$   
206  $\mu\text{N}$  ( $n=25$ ),  $11.4 \pm 1.43 \mu\text{N}$  ( $n=25$ ) and  $16.4 \pm 1.68 \mu\text{N}$  ( $n = 25$ ) for wild-type N2, LS587, AM725  
207 and NL5901, respectively (Fig 1E). Compared to the thrashing force of N2, these force values  
208 translated to a decrease of 68.7 %, 55.4 % and 35.7 % for LS587, AM725 and NL5901,

209 respectively. As for the second-dimensional analysis, we performed an image analysis using  
210 fluorometry to quantify changes in protein aggregation and morphology of the body wall  
211 muscles and validated the force measurement data.

212

213 **Fig 1: Evaluation of drug efficacy in *C. elegans* using two-dimensional analysis.** (A) Protocol for two-dimensional  
214 analysis. The first dimensional analysis evaluated the change in thrashing force exerted by the worm before and  
215 after drug treatment. The second dimensional analysis used image analysis to evaluate the effect of drug  
216 treatment on morphology of the body wall muscles and protein aggregation. (B) Scanning electron micrograph  
217 of the force assay chip showing elastomeric micropillars. (C) Optical image showing a partially immobilized young  
218 adult worm thrashing on micropillars. (D) Non-linear finite element model used to calculate the thrashing force  
219 from the displacements of micropillars. The deflection of micropillars in the FEM image matches that of the  
220 optical image in (C). (E) Line graph showing thrashing forces of wild type N2, DMD, ALS and PD model worms in  
221 young adult stage. The disease model worms showed a 68.7 %, 55.4 % and 35.7 % decrease in thrashing force  
222 for DMD, ALS and PD strains, respectively, compared to the thrashing force of wild-type N2.

223

224 *Melatonin and Prednisone improve thrashing force in DMD worm*

225 In *C. elegans*, the *dys-1* gene encodes the protein orthologous to the dystrophin protein  
226 associated with DMD in humans which causes progressive muscle loss [30]. To increase the  
227 amount of muscle degeneration, *dys-1* mutation has been combined with a hypomorphic  
228 mutation, *hlh-1* gene which is a homolog for the *MyoD* gene in human. Using the LS587 (*dys-1;hlh-1*)  
229 double mutant worm, we evaluated the effect of two pharmacological treatments,  
230 melatonin and prednisone, on the recovery of the thrashing force in our force assay chip.  
231 Melatonin has been reported to improve muscle metabolism and strength in mice[31] and  
232 clinical trials of DMD patients[31]. Prednisone is the recommended treatment for DMD

233 patients [7] and has been reported to reduce the number of degenerate muscle cells in LS587  
234 mutants[32].

235 In L4 worms, there was no significant difference in thrashing force with and without  
236 treatment for both drugs (Fig 2A and Fig 2B). This insignificant change in thrashing force was  
237 expected because L4 worms have only ~5% degenerate muscle cells[33]. However, in young  
238 adult worms, both drugs significantly improved the thrashing force of the worm (Fig 2C and  
239 Fig 2D). The average thrashing force around the mid-region of the worm (pillars 5-9) was  $9.1$   
240  $\pm 0.94 \mu\text{N}$  ( $n = 25$ ) and  $9.9 \pm 0.35 \mu\text{N}$  ( $n = 25$ ) after treatment with melatonin and prednisone,  
241 respectively, which translated to a 21.3 % and 40.1 % improvement compared to untreated  
242 mutant worms. Proximal to the constriction channel where the head region of the worm was  
243 trapped, we observed a 18.8 % and 22.2 % increase in thrashing force for melatonin and  
244 prednisone, respectively. These results showed that thrashing force can be used as a  
245 phenotype to evaluate drug efficacy in muscle-related disease mutants at both larval and  
246 adult developmental stages.

247

248 **Fig 2: Thrashing force assay in DMD model worm (LS587).** (A) L4 stage DMD model worms did not show any  
249 significant change in thrashing force when treated with 1 mM melatonin ( $N=25$ ,  $p > 0.05$ ). (B) Prednisone  
250 treatment on L4 model worms also did not show any change in thrashing force ( $N=25$ ,  $p > 0.05$ ). (C) Young adult  
251 worms treated with 1 mM melatonin showed significant improvement in thrashing force exerted across all the  
252 micropillars when compared to control worms which were not treated ( $N=25$ ,  $P < 0.0001$ ). (D) Prednisone  
253 treatment also increased the thrashing force of young adult worms compared to worms without any treatment  
254 ( $N=25$ ,  $p < 0.00001$ ). Significant differences were analyzed using the two-way ANOVA with Tukey's multiple  
255 comparison between average force values of control and treated worms, error bars indicate s.e.m.

256 To correlate muscle morphology with thrashing force, the sarcomere organization of the body  
257 wall muscles was analyzed optically using phalloidin stain[34]. The sarcomere organization

258 was classified using a scoring scale from 0-2 (Fig 3A). A score of 0 indicated healthy parallel  
259 and smooth actin filaments while scores 1 and 2 demonstrated wave-like fibers (damaged)  
260 with minor waves for score 1 and major damage for score 2[35]. In L4 worms, there was no  
261 significant difference in muscle fibers after treatments with both drugs, melatonin (n = 29)  
262 and prednisone (n=27) (Fig 3B and Fig 3C). However, there was significant improvement in  
263 the morphology of muscle fibers of young adult worms when treated with prednisone (n =  
264 28), with 30 % of worms recovering with score 0 (Figure 3c). Although there was an  
265 enhancement in muscle fibers of worms treated with 1 mM melatonin (n=35), it was not a  
266 significant difference.

267

268 **Fig 3: Morphology study of body wall muscle actin filaments for DMD model worm (LS587). The effect of drug**  
269 **treatment with prednisone on muscle morphology in young adult (YA) was studied using phalloidin staining.**

270 (A) Score 0 for DMD strain after treatment with prednisone showing smooth and parallel muscle fibers, score 1  
271 for unhealthy muscle with minor waves in control group, and score 2 for damaged actin filaments with major  
272 wave like filaments in control group (nontreated). (B) Treatment with 1 mM melatonin for L4 stage and young  
273 adult stage both did not show any significant recovery ( $p = 0.49$ ,  $p = 0.12$ ). (C) Treatment with 0.37 mM  
274 prednisone in L4 stage did not show any significant recovery in muscle morphology ( $p = 0.54$ ). However, in young  
275 adult a significant difference ( $p = 0.04$ ) was measured. Significant differences were analyzed using chi-squared  
276 test. (Melatonin control, L4 stage, N=32, drug treated N=29; Melatonin control, YA, N=30, drug treated N= 35;  
277 prednisone control, L4 stage, N=30, drug treated N=27; prednisone control, YA, N=31, drug treated N= 28).

278

279 *Riluzole shows dose dependent recovery of thrashing force*

280 As the second disease model, we used a transgenic worm, AM725, for ALS which expresses  
281 SOD1 proteins in the body wall muscle cells. We quantified the response of the thrashing  
282 force of the worm to two drugs: riluzole and doxycycline. Riluzole has been shown to reduce

283 disease progression and extend patients' survival by 3 – 6 months[36]. Doxycycline has been  
284 used to improve the motility of worms and reduce oxygen consumption[18].  
285 The AM725 mutant worms treated with 30  $\mu$ M of riluzole did not show any significant change  
286 in thrashing force compared to control worms seeded in the absence of the drug. However,  
287 when the concentration was increased to 100  $\mu$ M, there was a significant increase in  
288 thrashing force. In the mid region of the worm (micropillars 5 -9), the average of the maximum  
289 thrashing force was  $11.35 \pm 1.5 \mu$ N ( $n = 25$ ) and  $14.37 \pm 1.44 \mu$ N ( $n = 25$ ) for control worms  
290 and those treated with 100  $\mu$ M riluzole, respectively (Fig 4A), indicating a 26.6 % increase in  
291 thrashing force. With doxycycline, we observed an improvement in thrashing force for both  
292 concentrations of 10.5  $\mu$ M and 32  $\mu$ M. The peak thrashing force, at the mid-region of worm,  
293 had average values of  $7.13 \pm 0.1 \mu$ N,  $9.06 \pm 0.13 \mu$ N and  $9.38 \pm 0.1 \mu$ N ( $n = 27$  for all samples)  
294 for worms seeded with 0 (control), 10.5  $\mu$ M and 32  $\mu$ M doxycycline, respectively (Fig 4B).  
295 These results implied a ~27.1 % and ~31.6 % increase in thrashing force for 10.5  $\mu$ M and 32  
296  $\mu$ M doxycycline treatment, respectively. However, there was no significant difference in the  
297 thrashing force between the two doses of doxycycline. Within the reported dosages, only  
298 treatment with riluzole was dose-dependent.

299

300 **Fig 4: Thrashing force assay in ALS model worm (AM725).** (A) Mutant worms treated with 30  $\mu$ M riluzole did  
301 not show any significant change in thrashing force compared to untreated worms ( $p > 0.05$ ). When the  
302 concentration of riluzole was increased to 100  $\mu$ M, there was a significant increase in the measured thrashing  
303 force compared to control worms which were not treated with any drug ( $N=25$ ,  $p < 0.001$ ). (B) Treatment with  
304 either 10.5  $\mu$ M or 32  $\mu$ M of doxycycline significantly improved the thrashing force of AM725 worm compared  
305 to control worms ( $N=27$ ,  $p < 0.0001$ ). However, there was no significant difference in the thrashing force at the  
306 two different concentrations of doxycycline. Significant differences were analyzed using the two-way ANOVA

307 with Tukey's multiple comparison between average force values of control and treated worms, error bars  
308 indicate s.e.m.

309 The incensement of mutated SOD1 expression in the worm's body wall muscle cells is an  
310 indicator of disease severity[37]. Fig 5A, Fig 5B and Fig 5C show fluorescent images of SOD1  
311 protein aggregate before (n = 34) and after treatment with 30  $\mu$ M (n = 33) and 100  $\mu$ M (n=35)  
312 riluzole. For the analysis, the size, count, and total area of the protein aggregates were  
313 measured (S2 Table). After treatments at both concentrations, there was a significant  
314 difference in aggregate size and area. The average size decreased from  $69 \pm 6.4$  to  $57 \pm 5.4$   
315 and  $56 \pm 4.2$ , respectively, after treatment with 30  $\mu$ M and 100  $\mu$ M riluzole (Fig 5D) while the  
316 average area decreased from  $0.5 \pm 0.04$  to  $0.39 \pm 0.04$  and  $0.3 \pm 0.03$ , respectively. However,  
317 there was no significant difference in aggregates count between control and 30  $\mu$ M riluzole.  
318 However, with 100  $\mu$ M riluzole, there was a significant difference in average count which  
319 dropped from  $20 \pm 0.9$  to  $16 \pm 0.9$ . As comparison, the force analysis (Fig 4A) did not show  
320 any significant difference between control and 30  $\mu$ M. In terms of the aggregate average size,  
321 there was a decrease for both concentrations from  $55 \pm 2.8$  to  $50 \pm 2.1$  and  $43 \pm 3.1$ ,  
322 respectively, but only 32  $\mu$ M doxycycline decreased significantly (Fig 5E). Doxycycline  
323 treatment significantly decreased the average count for treatments with 10.5  $\mu$ M and 32  $\mu$ M  
324 from  $21 \pm 0.77$  to  $19 \pm 0.67$  and  $17 \pm 0.65$ , respectively. For the average area there was no  
325 significant decrease for 10.5  $\mu$ M while treatment with 32  $\mu$ M doxycycline showed a significant  
326 decrease in the average area.

327

328 **Fig 5: Quantitative analysis of morphology in ALS model (AM725).** (A) SOD1 protein aggregates in ALS model  
329 before treatment (n = 35). (B) After treatment with 30 $\mu$ M (n = 33). (C) After treatment with 100  $\mu$ M doxycycline  
330 (n = 35). (D) Quantification of protein aggregates after riluzole treatment. 30  $\mu$ M riluzole showed significant

331 changes in average size and area while its effect on the thrashing force was not significant. (E) After treatment  
332 with doxycycline in terms of aggregate size, count, and average area. In the case of doxycycline, 32  $\mu\text{M}$  ( $n = 40$ )  
333 showed significant changes while 10.5  $\mu\text{M}$  ( $n = 39$ ) showed no significant changes in terms of average size and  
334 area. Significant differences were analyzed using t-test, error bars indicate s.e.m.

335

### 336 *Drug treatment improves thrashing force in PD model worm*

337 Previous study[38] has observed alpha-synuclein ( $\alpha$ -synuclein), a small, predominantly  
338 presynaptic cytoplasmic protein in the brain of PD patients. Naturally, *C. elegans* does not  
339 possess an  $\alpha$ -synuclein homolog, however, several transgenic strains have been created such  
340 as NL5901 which has human  $\alpha$ -synuclein aggregation fused YFP in the muscles of the worm.  
341 Using this strain, we quantified the change in thrashing force of the worms after treatment  
342 with two pharmacological drugs, pramipexole and levodopa. Pramipexole, a dopamine  
343 agonist reported to improve depressive symptoms of PD patients[39], and levodopa, a  
344 dopamine precursor which has been the main therapy for PD patients[40].

345 Treatment of NL5901 worms with either drug showed recovery of thrashing force. Worms  
346 treated with 2.5 mM and 5 mM of pramipexole exerted an average thrashing force of  $22.09$   
347  $\pm 0.31$   $\mu\text{N}$  and  $23.15 \pm 0.22$   $\mu\text{N}$  (Fig 6A) around its mid-region (micropillars 5-9). Compared to  
348 the untreated worms (control) which exerted  $16.48 \pm 0.41$   $\mu\text{N}$  ( $n = 25$  for all samples), the  
349 results showed 34.1 % and 40.5 % increase in thrashing force for treatments with 2.5 mM and  
350 5 mM of pramipexole, respectively. There was no significant difference in the thrashing force  
351 at both drug concentrations. Using levodopa, the average thrashing force increased from  
352  $16.34 \pm 0.08$   $\mu\text{N}$  of the control group to  $19.5 \pm 0.2$   $\mu\text{N}$  and  $21.8 \pm 0.22$   $\mu\text{N}$  ( $n = 25$  for all  
353 samples) for worms treated at 0.7 mM and 2 mM, respectively (Fig 6B). This translated to an  
354 increment of 19.3 % and 33.3 % with 0.7 mM and 2 mM levodopa treatments, respectively,

355 indicating an increase in thrashing force with higher drug concentration. This result showed  
356 a dose-dependent improvement in thrashing force with levodopa while no such dose-  
357 dependent recovery was observed with pramipexole.

358

359 **Fig 6: Thrashing force assay in Parkinson Disease model worm (NL5901).** (A) Treatment of NL5901 worms with  
360 both 2.5 mM or 5 mM of pramipexole significantly improved the thrashing force compared to untreated worms  
361 (N=25,  $p < 0.001$ ). There was no significant difference in thrashing force of worms between the two  
362 concentrations of the drug. (B) With levodopa, there was significant change in thrashing force of worms treated  
363 with 0.7 mM of the drug. The thrashing force further increased with an increase in levodopa concentration from  
364 0.7 mM to 2 mM (N=25,  $p < 0.0001$ ). Significant differences were analyzed using the two-way ANOVA with  
365 Tukey's multiple comparison between average force values of control and treated worms, error bars indicate  
366 s.e.m.

367 In NL5901 *C. elegans* strain, the levels of  $\alpha$ -synuclein was measured by estimating the  
368 fluorescence intensity of YFP in the muscle cells[27]. When the strain was treated with  
369 pramipexole, there no significant difference in fluorescence intensity between control and  
370 2.5 mM treated worms (n = 27) (Fig 7D). However, treatment with 5 mM pramipexole (n =  
371 24), there was significant decrease in the fluorescence intensity of the protein aggregates.  
372 Treatment with 0.7mM (n = 32) and 2mM (n = 31) levodopa did not show any significant  
373 difference in fluorescence signal intensity (Fig 7E).

374

375 **Fig 7: Quantification of fluorescence intensity of  $\alpha$ -synuclein protein in NL5901.** (A) Fluorescent image of  $\alpha$ -  
376 synuclein protein accumulation before treatment (n = 31). (B) after treatment with 2.5 mM (n = 27). (C) after  
377 treatment with 5 mM (n = 24) pramipexole. (D) Fluorescence intensity of protein accumulation before and after  
378 treatment with pramipexole. (E) Fluorescence intensity of protein accumulation before (n = 35) and after  
379 treatment with levodopa 0.7mM (n=32) and 2mM (n=31). Significant differences were analyzed using t-test,  
380 error bars indicate s.e.m.



## 381 Discussion

### 382 *Duchenne Muscular Dystrophy*

383 In this study, we treated *C. elegans* DMD mutant (LS587) with prednisone and melatonin, and  
384 observed significant improvement in the thrashing force of young adult worms. However,  
385 there was no change observed in L4 worms as expected. A possible explanation for this result  
386 could be due to non-degeneration of muscle cells until after L4 stage as a result of cellular  
387 repairs which occur at the end of each larval stage and delay muscle cell damages till  
388 adulthood[32]. The significant improvement in young adult worms aligned with the prior  
389 studies that treated single mutant *dys-1*[14] and double mutant *dys-1;h/h-1*[32] worms with  
390 prednisone and/or melatonin. In particular, our results with partially immobilized worms  
391 were in close agreement with the outcomes of the study conducted Hewitt et. al.[14]which  
392 used the same dosage of drug treatment on free-moving *dys-1(eg33)* mutant worms. Patients  
393 treated with melatonin have been reported to decrease serum creatine kinase which  
394 indicates reduced muscle damage and oxidative stress[31]. Similar reduction in oxidative  
395 stress and improved redox status have also been reported in mdx mice treated with  
396 melatonin[31]. Prednisone is known to act against inflammatory processes in the muscles of  
397 DMD patients[41], however this cannot be investigated in *C. elegans* due to the lack of  
398 inflammatory-mediated amplification in the worm's degenerative muscles. Another and a  
399 study suggested the sarcolemma stabilization due to little alterations in plasma membrane of  
400 muscle cells as another mechanism through which prednisone acts[32]. The image analysis  
401 of muscle morphology for DMD model supported the thrashing force data that there was no  
402 significant difference observed until L4 stage for both drugs, melatonin and prednisone. Even  
403 worms treated with melatonin until young adult stage did not show a significant recovery in

404 muscle morphology while the thrashing force assay detected a significant increase of the  
405 thrashing force once treated. In the case of prednisone, however, its muscle morphology  
406 improved significantly when treated until young adult stage. It has been reported that LS587  
407 mutant treated with prednisone recovered its muscle morphology almost to healthy  
408 state[33]. This result suggested that the thrashing force analysis was more sensitive than the  
409 image analysis when detecting the efficacy of drugs.

410

#### 411 *Amyotrophic Lateral Sclerosis*

412 Both riluzole, an internationally approved ALS drug, and doxycycline, an antibiotic, were able  
413 to improve the thrashing force of *C. elegans*. The specific mechanism through which riluzole  
414 acts is still unknown, but several neuroprotective properties have been ascribed to it, such as  
415 inhibition of presynaptic glutamate release and upregulation of the expression of growth  
416 factors[42,43]. Doxycycline has been reported to improve locomotion in worms through  
417 activation of mitochondrial unfolded protein (UPR<sup>mt</sup>)[18]. A potential explanation for this  
418 working mechanism of doxycycline is due to the fact that mitochondrial accumulation of  
419 misfolded *SOD1* has been reported as a potential trigger for motor neuron death. Our result  
420 was in agreement with the previous studies that have shown amelioration of loss of motility  
421 in ALS mutant worms through treatment with riluzole[13] and doxycycline[18]. The dose  
422 dependence of the thrashing force of worms treated with riluzole at 30  $\mu$ M and 100  $\mu$ M  
423 corroborated with the results from the previously reported study on worm speed[13].  
424 Doxycycline significantly improved the thrashing force at both concentrations, 10.5  $\mu$ M and  
425 32  $\mu$ M. When evaluating the protein aggregates in terms of count, size and average area,  
426 riluzole, was more effective with higher dosage of 100  $\mu$ M compared to 30  $\mu$ M in agreement  
427 with the thrashing force measurement. The average count of aggregates decreased

428 significantly after treatment with 100  $\mu$ M of riluzole but not with 30  $\mu$ M. In terms of average  
429 size and area, there was a significant decrease when treated with both 30  $\mu$ M and 100  $\mu$ M of  
430 riluzole. In comparison, the force measurement showed no effect of the drug at 30  $\mu$ M. This  
431 result implied that the image analysis can also be more sensitive to the changes due to drug  
432 treatment than the force analysis. This finding proved the complementarity of both analyses  
433 when quantifying the drug efficacy. Doxycycline has been reported to decrease the size of  
434 *SOD1* protein aggregate but not the aggregate count for SJ4100 strain[18]. In this study,  
435 doxycycline treatment decreased both the size and count of the protein aggregates  
436 significantly at 32  $\mu$ M but not at 10.5  $\mu$ M whereas the force analysis could discern a subtle  
437 change at the lower drug concentration.

438

#### 439 *Parkinson's Disease*

440 Drug treatment of the PD model with pramipexole and levodopa showed an improvement in  
441 thrashing force for both drugs. However, pramipexole showed a better recovery in thrashing  
442 force compared to levodopa. In clinical trials, pramipexole has been reported to slow down  
443 the onset of dopaminergic neurons in PD patients thereby improving the symptoms of the  
444 disease[39]. Levodopa is the leading treatment for PD and has proved highly effective in  
445 ameliorating symptoms of the disease[40]. The improvement of thrashing force exerted by  
446 the worms treated with levodopa agrees with the prior studies on the locomotory parameters  
447 of PD model worms with similar treatment[44]. A potential explanation for the effect of  
448 levodopa is the increase in polarized distribution and expression of type-1 dopamine  
449 receptors in acetylcholinergic motor neurons[44] compared to untreated worms. Our result  
450 showed that the improvement of thrashing force is not dependent on drug dosage for  
451 pramipexole at the concentration levels used in this study. For levodopa, however, there was

452 a dependency showing higher thrashing force at 2 mM compared to 0.7 mM. To the best of  
453 our knowledge, this was the first time that the effect of pramipexole has been studied on a  
454 locomotory parameter of PD *C. elegans* model. This result underscored the potential of  
455 pramipexole as treatment for PD considering the complications due to chronic use of  
456 levodopa[40]. When analyzing the protein accumulation by measuring the fluorescence  
457 intensity of YFP in the muscle cells, the fluorescence intensity decreased when treated with 5  
458 mM pramipexole, but no significant difference was observed when treated with 2.5 mM.  
459 When treated with both concentrations of levodopa, 0.7 mM and 2 mM, there was no  
460 significant difference measured. Compared to the thrashing force analysis which showed  
461 significant improvement with treatment of pramipexole or levodopa at both concentrations,  
462 the image analysis seemed to be less sensitive. In all three disease model cases, the force  
463 analysis seemed to be generally more sensitive than the image analysis and delivered a  
464 quantitative readout less ambiguous compared to the analysis of fluorescent images.  
465 However, our study also confirmed that both the thrashing force as well as the image analysis  
466 should be conducted together to validate the measurement data and to detect subtle changes  
467 in complementarity since one of them might be more sensitive than the other one depending  
468 on the disease models such as in ALS model.

469

## 470 **Conclusion**

471 To evaluate the efficacy of drug treatment on three *C. elegans* models for neuromuscular  
472 diseases, we have implemented a two-dimensional workflow analysis consisting of a  
473 thrashing force measurement in a microfluidic chip and an image analysis using an agarose  
474 pad. In the first-dimensional analysis, we evaluated thrashing force of these disease model

475 worms before and after drug treatment, while in the second-dimensional analysis, we  
476 performed a quantitative image analysis of the protein aggregation and morphological  
477 studies of the body wall muscles. The thrashing force analysis was more sensitive to measure  
478 the changes resulting from drug treatment compared to the image analysis as demonstrated  
479 in the case of DMD and PD models and partially in ALS model. To the best of our knowledge,  
480 this was the first study that reported the force exerted by the body wall muscles of ALS and  
481 PD *C. elegans* models. All these results underlined the potential of our force assay chip in  
482 screening of potential drug candidates for the treatment of DMD, ALS, PD and potentially  
483 other muscle-related diseases. Our partial immobilization-based device reduced the  
484 complexities of instrumentation associated with tracking worms through computer vision.  
485 which offers scalability for multiplexing by using multiple parallel channels in the force assay  
486 chip. This multiplexing step in combination with an imaging chip for *C. elegans* could  
487 ultimately lead to higher throughput for drug screening.

488

## 489 **Conflicts of Interest**

490 There are no conflicts of interest to declare.

491

## 492 **Acknowledgements**

493 The authors will like to acknowledge support from Dr. Hala Fahs, Suma Gopinathan and  
494 Fathima Refai of the Center for Genomics and Systems Biology, NYU Abu Dhabi in sourcing  
495 the *C. elegans* strains used in this work. We acknowledge Navajit Baban's support in drawing  
496 the 3D schematic images. We are also thankful for the support by NYUAD microfabrication

497 core facility for the device fabrication. This work was supported by the Al Jalila Foundation

498 [AJF201633]. S. Sofela was supported by the NYUAD Global PhD Fellowship program.

499

500

501

## 502 **References**

- 503 1. McDonald CM. Physical activity, health impairments, and disability in neuromuscular  
504 disease. *American Journal of Physical Medicine and Rehabilitation*. 2002.  
505 doi:10.1097/00002060-200211001-00012
- 506 2. Sleigh JN, Sattelle DB. C. *Elegans* models of neuromuscular diseases expedite  
507 translational research. *Transl Neurosci*. 2010. doi:10.2478/v10134-010-0032-9
- 508 3. Srivanitchapoom P, Pandey S, Hallett M. Drooling in Parkinson's disease: A review.  
509 *Parkinsonism and Related Disorders*. 2014. doi:10.1016/j.parkreldis.2014.08.013
- 510 4. Bidkar PU, Satya Prakash MVS. *Neuromuscular Disorders. Essentials of*  
511 *Neuroanesthesia*. 2017. doi:10.1016/B978-0-12-805299-0.00045-2
- 512 5. Morris ME. Locomotor Training in People With Parkinson Disease. *Phys Ther*. 2006.  
513 doi:10.2522/ptj.20050277
- 514 6. Markaki M, Tavernarakis N. Modeling human diseases in *Caenorhabditis elegans*.  
515 *Biotechnol J*. 2010;5: 1261–1276. doi:10.1002/biot.201000183
- 516 7. Gaud A, Simon JM, Witzel T, Carre-Pierrat M, Wermuth CG, Ségalat L. Prednisone  
517 reduces muscle degeneration in dystrophin-deficient *Caenorhabditis elegans*.  
518 *Neuromuscul Disord*. 2004;14: 365–370. doi:10.1016/j.nmd.2004.02.011
- 519 8. Braungart E, Gerlach M, Riederer P, Baumeister R, Hoener MC. *Caenorhabditis*  
520 *elegans* MPP+ model of Parkinson's disease for high-throughput drug screenings.  
521 *Neurodegener Dis*. 2004;1: 175–183. doi:10.1159/000080983
- 522 9. Marvanova M, Nichols CD. Identification of neuroprotective compounds of  
523 *caenorhabditis elegans* dopaminergic neurons against 6-OHDA. *J Mol Neurosci*.  
524 2007;31: 127–37. doi:10.1385/jmn/31:02:127

- 525 10. Bono M de, Villu Maricq A. NEURONAL SUBSTRATES OF COMPLEX BEHAVIORS IN C.  
526 ELEGANS. *Annu Rev Neurosci.* 2005;28: 451–501.  
527 doi:10.1146/annurev.neuro.27.070203.144259
- 528 11. Berri S, Boyle JH, Tassieri M, Hope IA, Cohen N. Forward locomotion of the nematode  
529 *C. elegans* is achieved through modulation of a single gait. *HFSP J.* 2009;3: 1–9.  
530 doi:10.2976/1.3082260
- 531 12. Boyle JH, Berri S, Cohen N. Gait modulation in *C. elegans*: An integrated  
532 neuromechanical model. *Front Comput Neurosci.* 2012.  
533 doi:10.3389/fncom.2012.00010
- 534 13. Ikenaka K, Tsukada Y, Giles AC, Arai T, Nakadera Y, Nakano S, et al. A behavior-based  
535 drug screening system using a *Caenorhabditis elegans* model of motor neuron  
536 disease. *Sci Rep.* 2019;9: 1–10. doi:10.1038/s41598-019-46642-6
- 537 14. Hewitt JE, Pollard AK, Lesanpezeshki L, Deane CS, Gaffney CJ, Etheridge T, et al.  
538 Muscle strength deficiency and mitochondrial dysfunction in a muscular dystrophy  
539 model of *Caenorhabditis elegans* and its functional response to drugs. *Dis Model*  
540 *Mech.* 2018;11: dmm036137. doi:10.1242/dmm.036137
- 541 15. S. Sofela, A. Orozaliev, S.Sahloul, N. Chaturvedi, D. Shahjerdi, Y.-Ak Song D.  
542 Quantitative Analysis of Muscle Atrophy under Hyperglycemic Conditions using *C.*  
543 *elegans* Model in a Scalable Microfluidic Device. 22nd International Conference on  
544 Miniaturized Systems for Chemistry and Life Sciences. 2018.
- 545 16. Sofela S, Sahloul S, Bhattacharjee S, Bose A, Usman U, Song Y-A. Quantitative  
546 fluorescence imaging of mitochondria in body wall muscles of *Caenorhabditis elegans*  
547 under hyperglycemic conditions using a microfluidic chip. *Integr Biol.* 2020;12: 150–  
548 160. doi:10.1093/intbio/zyaa011



- 549 17. Sofela S, Sahloul S, Rafeie M, Kwon T, Han J, Warkiani ME, et al. High-throughput  
550 sorting of eggs for synchronization of *C. elegans* in a microfluidic spiral chip. *Lab Chip*.  
551 2018;18: 679–687. doi:10.1039/C7LC00998D
- 552 18. Cornaglia M, Krishnamani G, Mouchiroud L, Sorrentino V, Lehnert T, Auwerx J, et al.  
553 Automated longitudinal monitoring of in vivo protein aggregation in  
554 neurodegenerative disease *C. elegans* models. *Mol Neurodegener*. 2016;11: 1–13.  
555 doi:10.1186/s13024-016-0083-6
- 556 19. Laranjeiro R, Harinath G, Hewitt JE, Hartman JH, Royal MA, Meyer JN, et al. Swim  
557 exercise in *Caenorhabditis elegans* extends neuromuscular and gut healthspan,  
558 enhances learning ability, and protects against neurodegeneration. *Proc Natl Acad*  
559 *Sci*. 2019;116: 23829–23839. doi:10.1073/pnas.1909210116
- 560 20. Salam S, Ansari A, Amon S, Rezai P, Selvaganapathy PR, Mishra RK, et al. A  
561 microfluidic phenotype analysis system reveals function of sensory and dopaminergic  
562 neuron signaling in *C. elegans* electrotactic swimming behavior. *Worm*. 2013;2:  
563 e24558. doi:10.4161/worm.24558
- 564 21. Johari S, Nock V, Alkaisi MM, Wang W. On-chip analysis of *C. elegans* muscular forces  
565 and locomotion patterns in microstructured environments. *Lab Chip*. 2013;13: 1699–  
566 1707. doi:10.1039/C3LC41403E
- 567 22. Khare SM, Awasthi A, Venkataraman V, Koushika SP. Colored polydimethylsiloxane  
568 micropillar arrays for high throughput measurements of forces applied by genetic  
569 model organisms. *Biomicrofluidics*. 2015;9: 014111. doi:10.1063/1.4906905
- 570 23. Rahman M, Hewitt J, Van-Bussel F, Edwards H, Blawdziewicz J, Szewczyk N, et al.  
571 NemaFlex: A microfluidics-based technology for standardized measurement of  
572 muscular strength of *C. elegans*. *Lab Chip*. 2018; 2187–2201.

- 573           doi:10.1039/C8LC00103K
- 574   24.   Sofela S, Sahloul S, Stubbs C, Orozaliev A, Refai FS, Esmaeel AM, et al. Phenotyping of  
575           Thrashing Forces Exerted by Partially Immobilized *C. elegans* using Elastomeric  
576           Micropillar Arrays. *Lab Chip*. 2019;19: 3685–3696. doi:10.1039/C9LC00660E
- 577   25.   Qiu Z, Tu L, Huang L, Zhu T, Nock V, Yu E, et al. An integrated platform enabling  
578           optogenetic illumination of *Caenorhabditis elegans* neurons and muscular force  
579           measurement in microstructured environments. *Biomicrofluidics*. 2015;9: 014123.  
580           doi:10.1063/1.4908595
- 581   26.   Stiernagle T. Maintenance of *C. elegans*. *WormBook* : the online review of *C. elegans*  
582           biology. 2006. pp. 1–11. doi:10.1895/wormbook.1.101.1
- 583   27.   Chalorak P, Jattujan P, Nobsathian S, Poomtong T, Sobhon P, Meemon K. *Holothuria*  
584           *scabra* extracts exhibit anti-Parkinson potential in *C. elegans*: A model for anti-  
585           Parkinson testing. *Nutr Neurosci*. 2018;21: 427–438.  
586           doi:10.1080/1028415X.2017.1299437
- 587   28.   Young AT, Ly KN, Wilson C, Lehnert K, Snell RG, Reid SJ, et al. Modelling brain  
588           dopamine-serotonin vesicular transport disease in *Caenorhabditis elegans*. *Dis Model*  
589           *Mech*. 2018;11: dmm035709. doi:10.1242/dmm.035709
- 590   29.   Driscoll M. Mounting animals for observation with Nomarski DIC optics. *WormBook*.  
591           2008.
- 592   30.   Bessou C, Giugia J-B, Franks CJ, Holden-Dye L, Ségalat L. Mutations in the  
593           *Caenorhabditis elegans* dystrophin-like gene *dys-1* lead to hyperactivity and suggest a  
594           link with cholinergic transmission. *Neurogenetics*. 1998;2: 61–72.  
595           doi:10.1007/s100480050053
- 596   31.   Hibaoui Y, Reutenauer-Patte J, Patthey-Vuadens O, Ruegg UT, Dorchies OM.

- 597 Melatonin improves muscle function of the dystrophic mdx 5Cv mouse, a model for  
598 Duchenne muscular dystrophy. *J Pineal Res.* 2011. doi:10.1111/j.1600-  
599 079X.2011.00871.x
- 600 32. Brouilly N, Lecroisey C, Martin E, Pierson L, Mariol MC, Mounier N, et al. Ultra-  
601 structural time-course study in the *C. elegans* model for Duchenne muscular  
602 dystrophy highlights a crucial role for sarcomere-anchoring structures and  
603 sarcolemma integrity in the earliest steps of the muscle degeneration process. *Hum*  
604 *Mol Genet.* 2015;24: 6428–6445. doi:10.1093/hmg/ddv353
- 605 33. Brouilly N, Lecroisey C, Martin E, Pierson L, Mariol MC, Mounier N, et al. Ultra-  
606 structural time-course study in the *C. elegans* model for Duchenne muscular  
607 dystrophy highlights a crucial role for sarcomere-anchoring structures and  
608 sarcolemma integrity in the earliest steps of the muscle degeneration process. *Hum*  
609 *Mol Genet.* 2015;24: 6428–6445. doi:10.1093/hmg/ddv353
- 610 34. Gieseler K, Grisoni K, Ségalat L. Genetic suppression of phenotypes arising from  
611 mutations in dystrophin-related genes in *Caenorhabditis elegans*. *Curr Biol.* 2000;10:  
612 1092–1097. doi:10.1016/S0960-9822(00)00691-6
- 613 35. Chuang H-S, Kuo W-J, Lee C-L, Chu I-H, Chen C-S. Exercise in an electrotactic flow  
614 chamber ameliorates age-related degeneration in *Caenorhabditis elegans*. *Sci Rep.*  
615 2016;6: 28064. doi:10.1038/srep28064
- 616 36. Chen S, Sayana P, Zhang X, Le W. Genetics of amyotrophic lateral sclerosis: an update.  
617 *Mol Neurodegener.* 2013;8: 28. doi:10.1186/1750-1326-8-28
- 618 37. Dong L, Cornaglia M, Krishnamani G, Zhang J, Mouchiroud L, Lehnert T, et al.  
619 Reversible and long-term immobilization in a hydrogel-microbead matrix for high-  
620 resolution imaging of *Caenorhabditis elegans* and other small organisms. *PLoS One.*

- 621 2018;13: 1–20. doi:10.1371/journal.pone.0193989
- 622 38. Spillantini MG, Crowther RA, Jakes R, Hasegawa M, Goedert M. -Synuclein in  
623 filamentous inclusions of Lewy bodies from Parkinson’s disease and dementia with  
624 Lewy bodies. Proc Natl Acad Sci. 1998;95: 6469–6473. doi:10.1073/pnas.95.11.6469
- 625 39. Barone P, Poewe W, Albrecht S, Debieuvre C, Massey D, Rascol O, et al. Pramipexole  
626 for the treatment of depressive symptoms in patients with Parkinson’s disease: a  
627 randomised, double-blind, placebo-controlled trial. Lancet Neurol. 2010;9: 573–580.  
628 doi:10.1016/S1474-4422(10)70106-X
- 629 40. LeWitt PA, Fahn S. Levodopa therapy for Parkinson disease: Table. Neurology.  
630 2016;86: S3–S12. doi:10.1212/WNL.0000000000002509
- 631 41. Mendell JR, Moxley RT, Griggs RC, Brooke MH, Fenichel GM, Miller JP, et al.  
632 Randomized, Double-Blind Six-Month Trial of Prednisone in Duchenne’s Muscular  
633 Dystrophy. N Engl J Med. 1989. doi:10.1056/NEJM198906153202405
- 634 42. Doble A. The pharmacology and mechanism of action of riluzole. Neurology. 1996;47:  
635 233S-241S. doi:10.1212/WNL.47.6\_Suppl\_4.233S
- 636 43. Mizuta I, Ohta M, Ohta K, Nishimura M, Mizuta E, Kuno S. Riluzole stimulates nerve  
637 growth factor, brain-derived neurotrophic factor and glial cell line-derived  
638 neurotrophic factor synthesis in cultured mouse astrocytes. Neurosci Lett. 2001;310:  
639 117–120. doi:10.1016/S0304-3940(01)02098-5
- 640 44. Gupta DK, Hang X, Liu R, Hasan A, Feng Z. Levodopa-Induced Motor and Dopamine  
641 Receptor Changes in *Caenorhabditis elegans* Overexpressing Human Alpha-  
642 Synuclein. Neurodegener Dis. 2016;16: 179–183. doi:10.1159/000440845
- 643
- 644

## 645 **Supporting Information**

### 646 **S1 Fig, The microfluidic chip for quantifying thrashing force exerted by *C. elegans*. (A)**

647 Optical image showing two developmental stages of worms (L4 and young adult) thrashing  
648 on the PDMS-based micropillars. The deflection of the micropillars was used to quantify the  
649 thrashing force exerted by the worm. (B) Table showing geometric parameters for force  
650 assay chip and diameters of worms used in this study.

651

### 652 **S1 Table, Summary of worm culture and drug treatments.**

653

### 654 **S2 Table, Summary of significance test of SOD1 protein aggregate quantification before 655 and after drug treatment.**

656

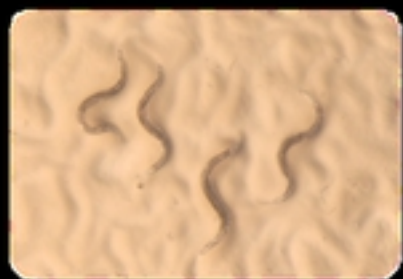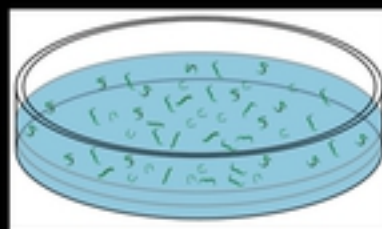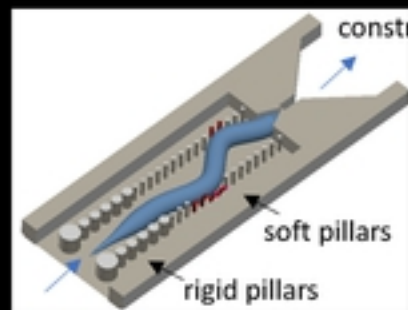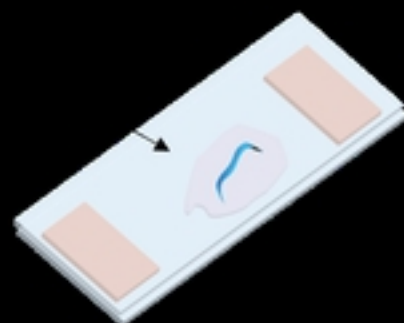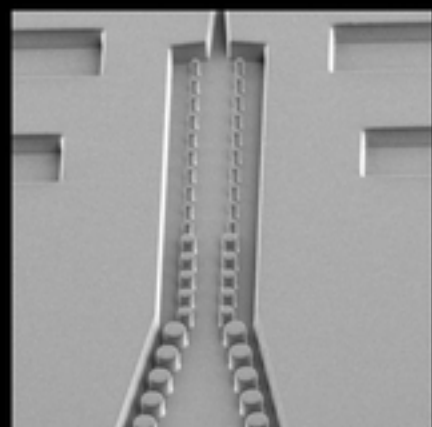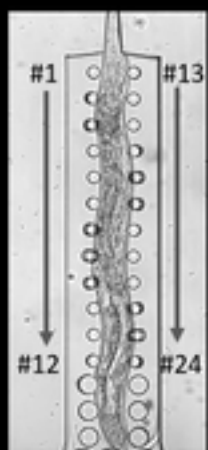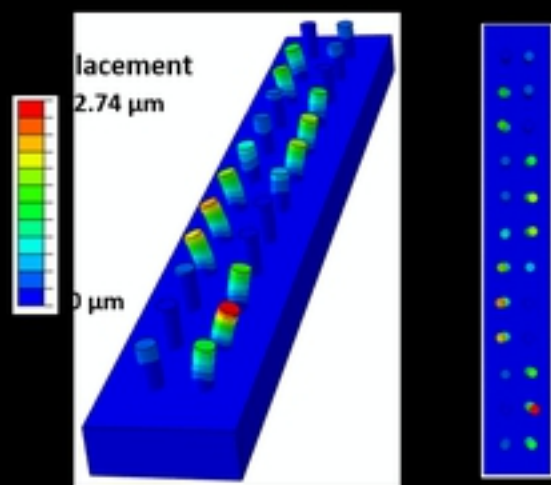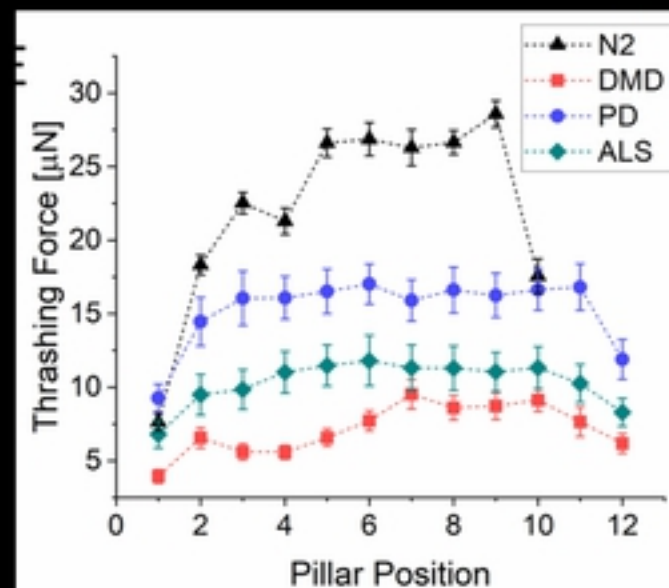

Fig1

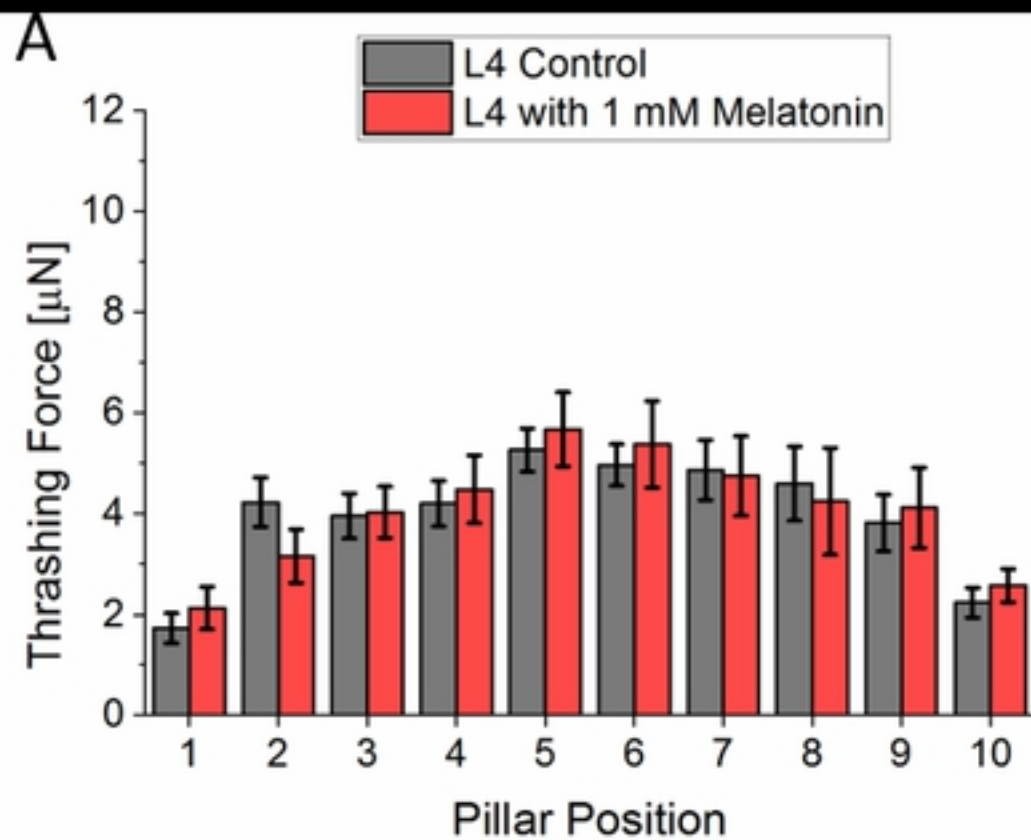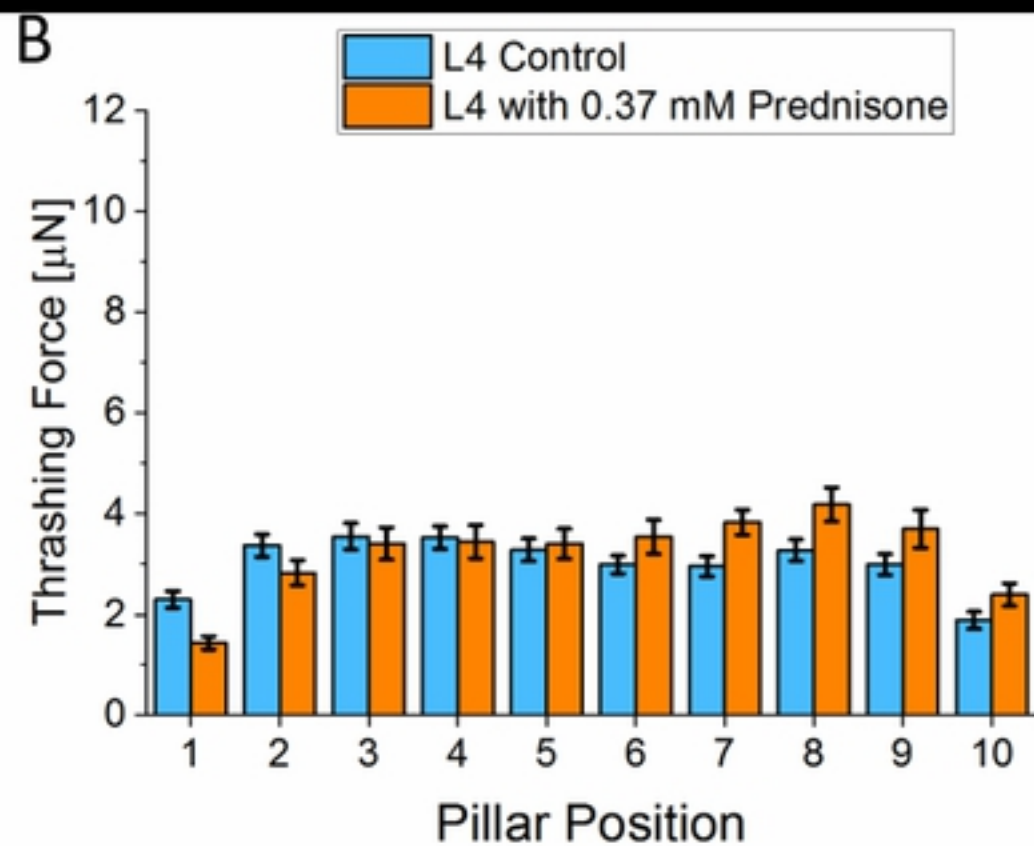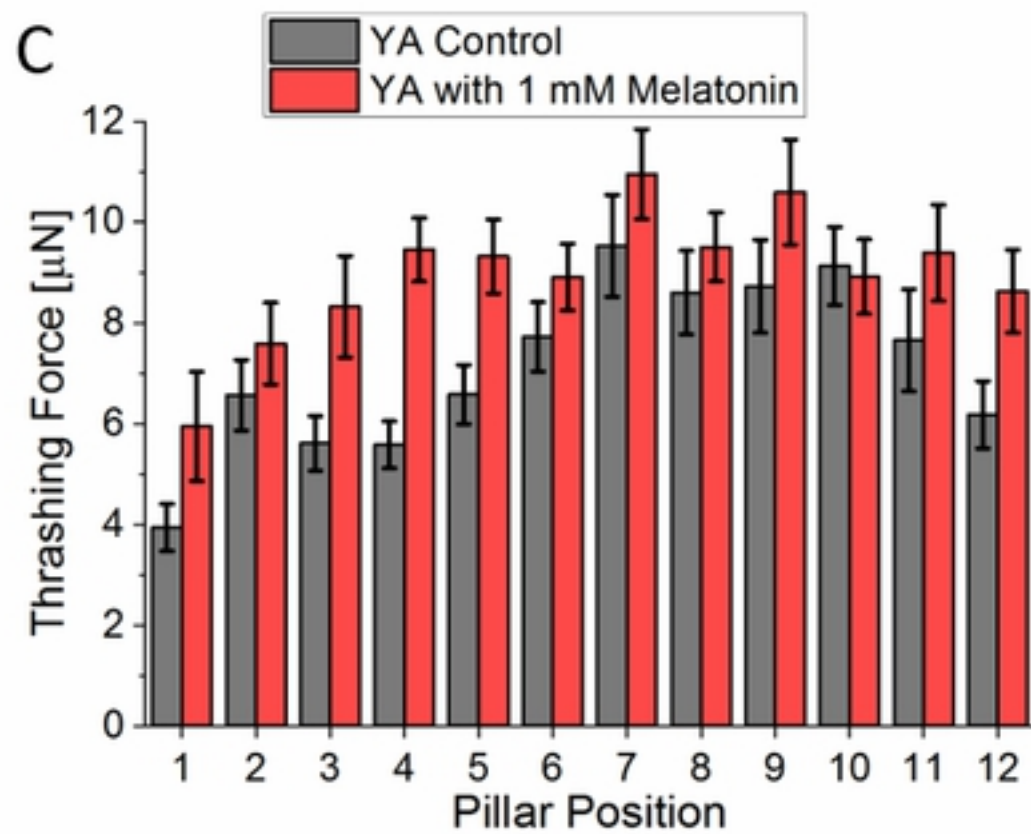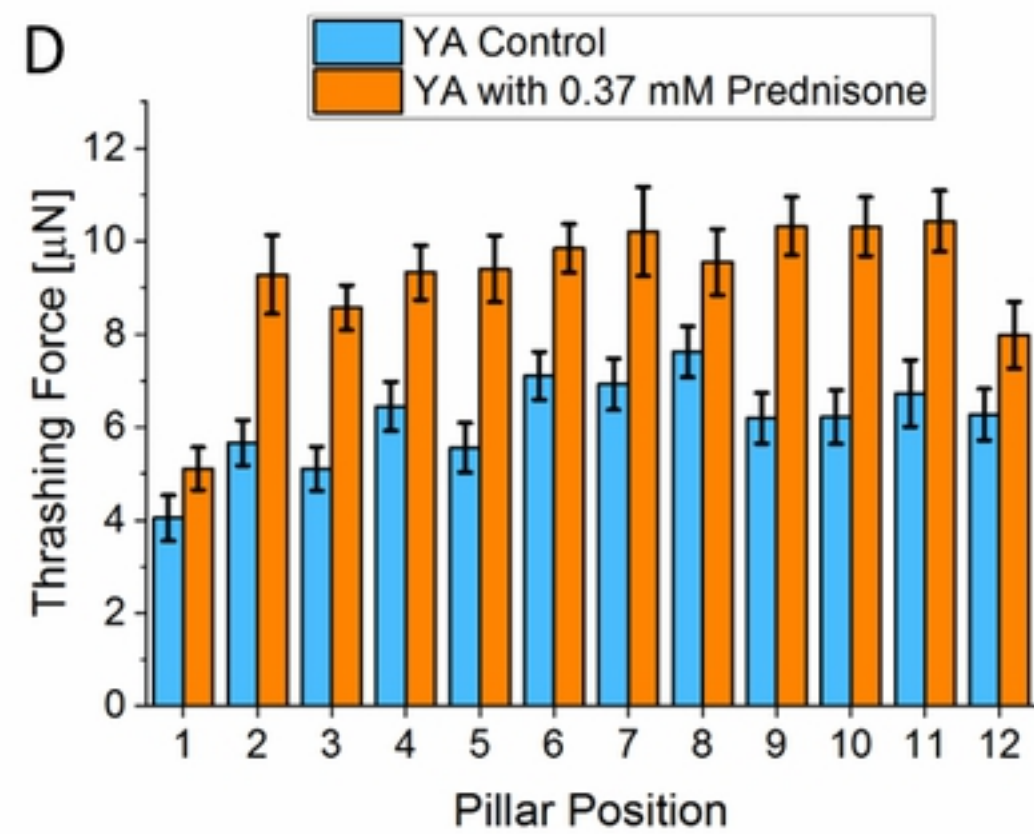

Fig2



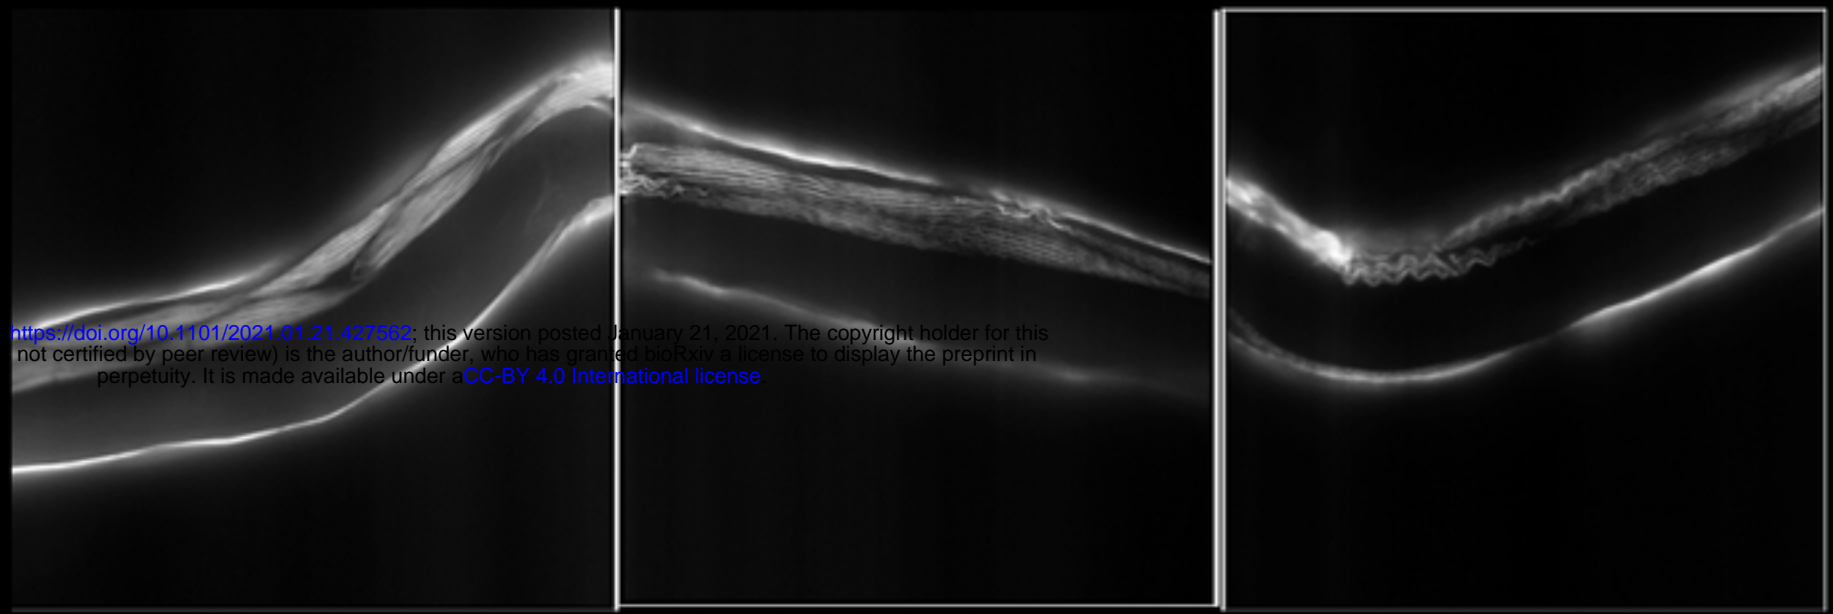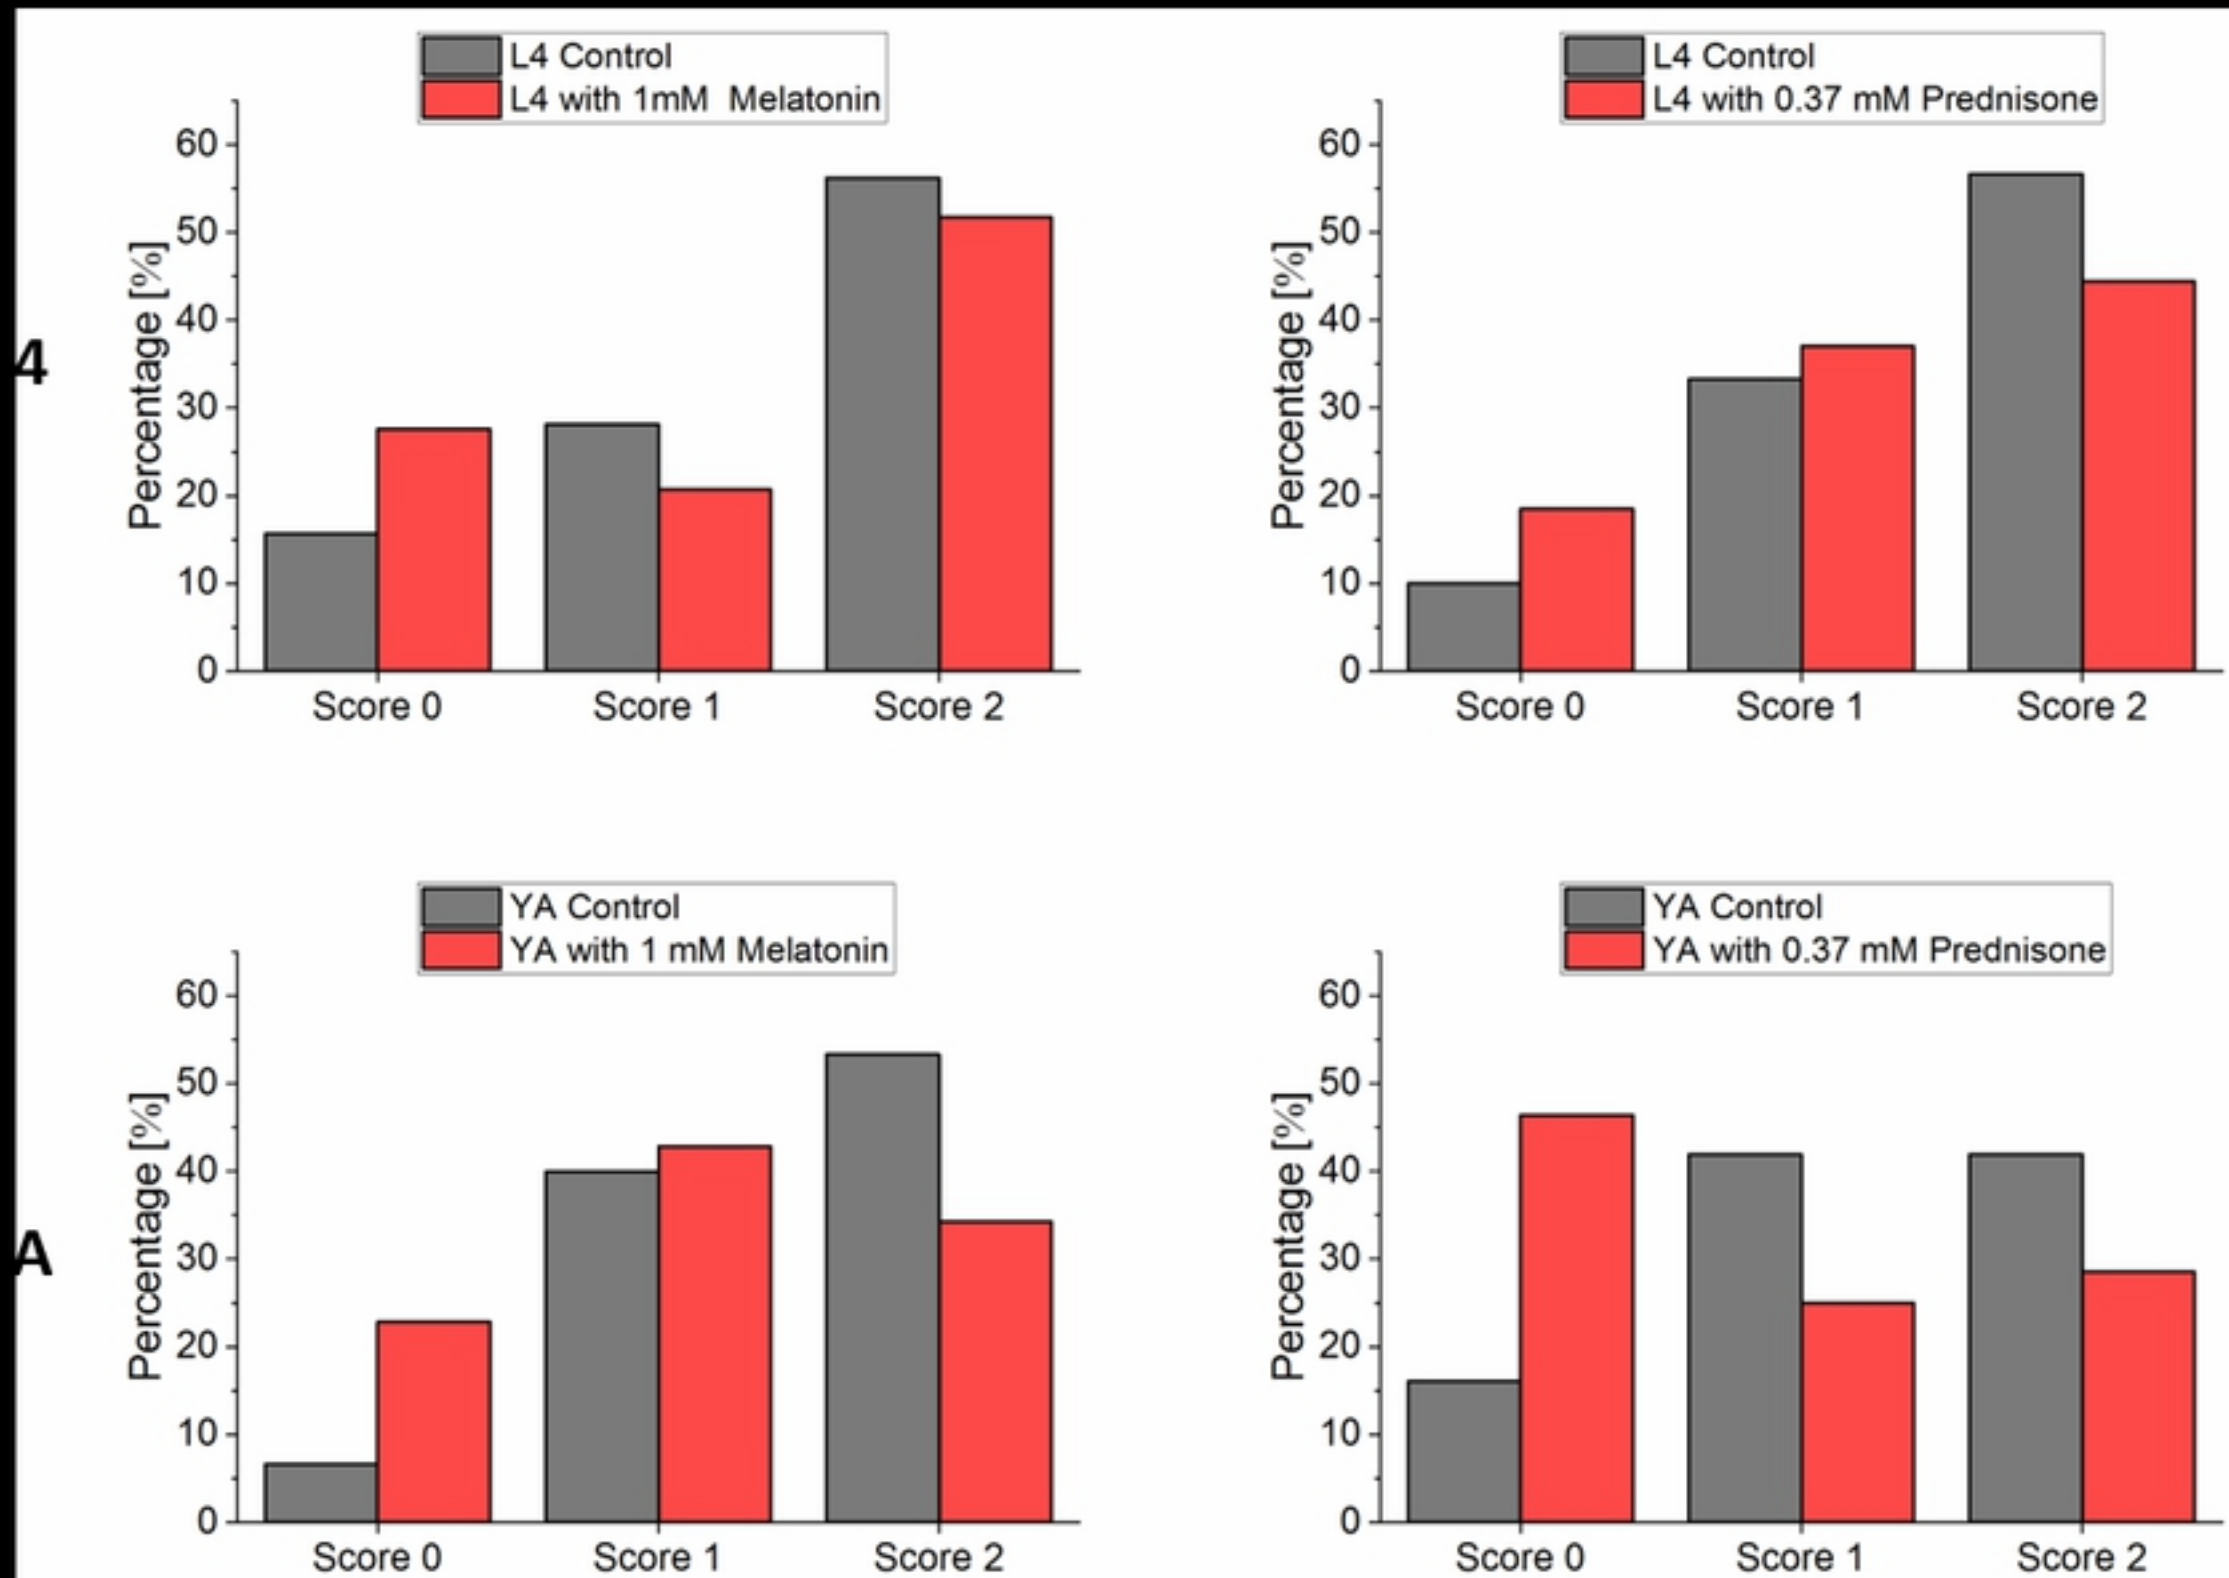

Fig3



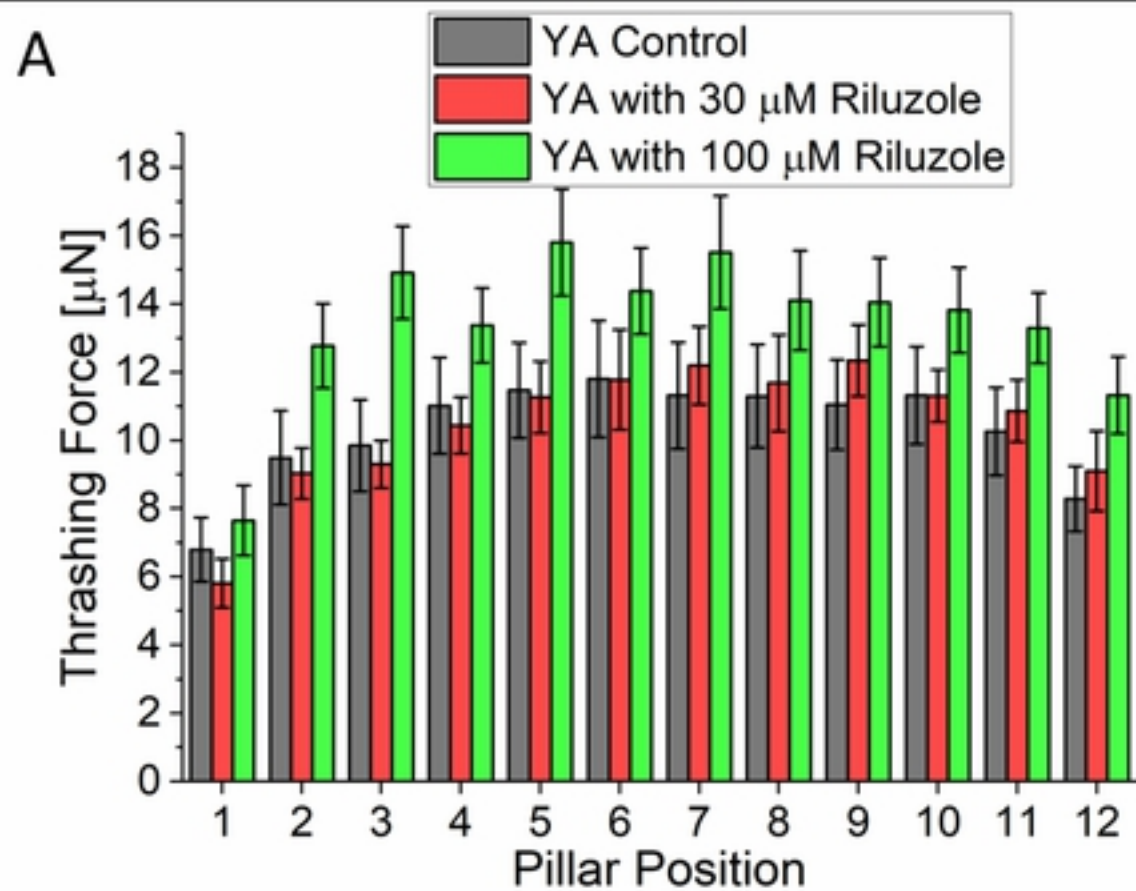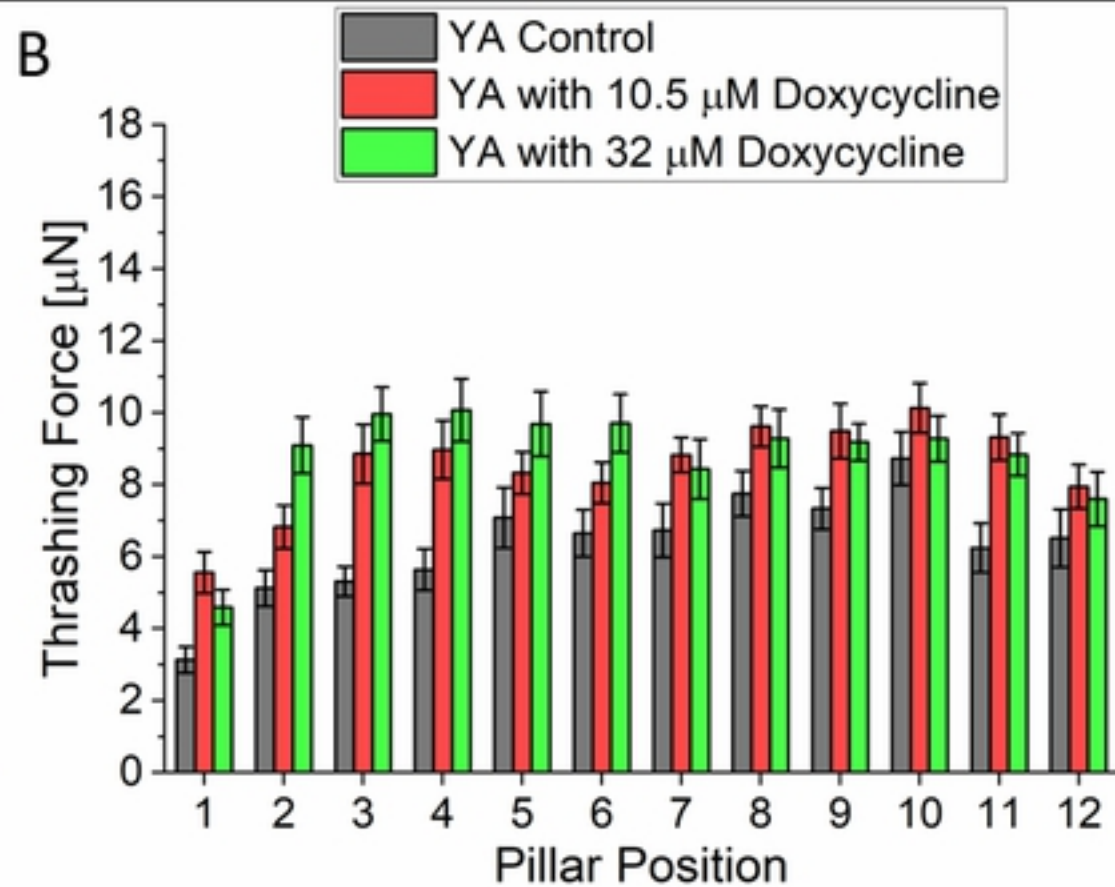

Fig4

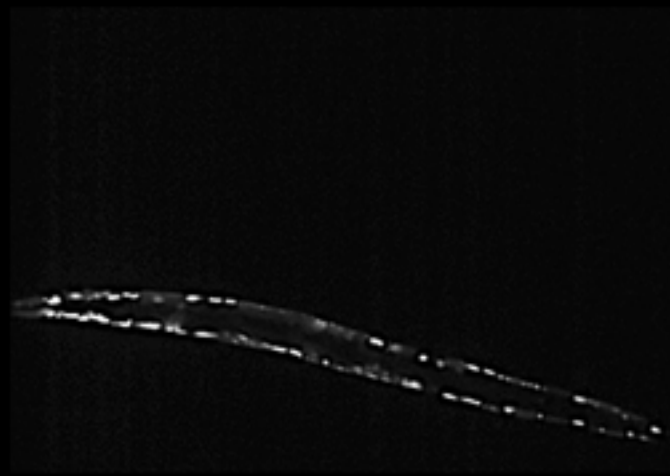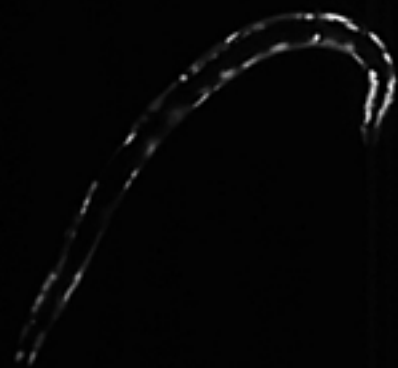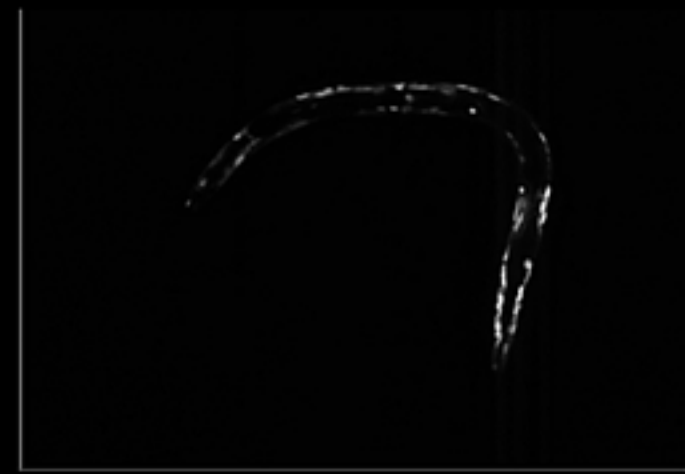

D

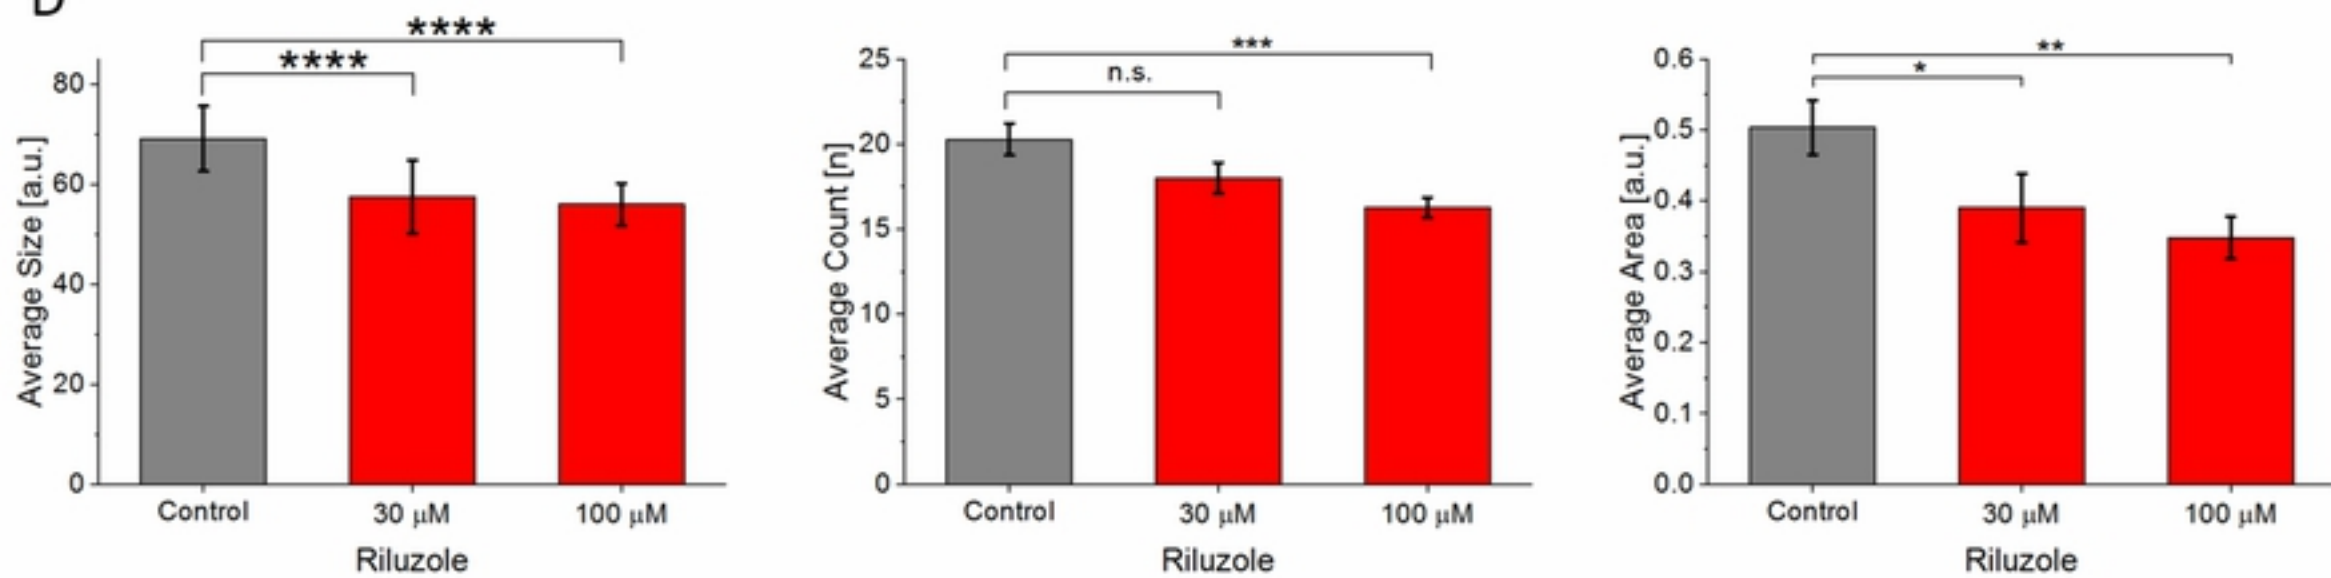

E

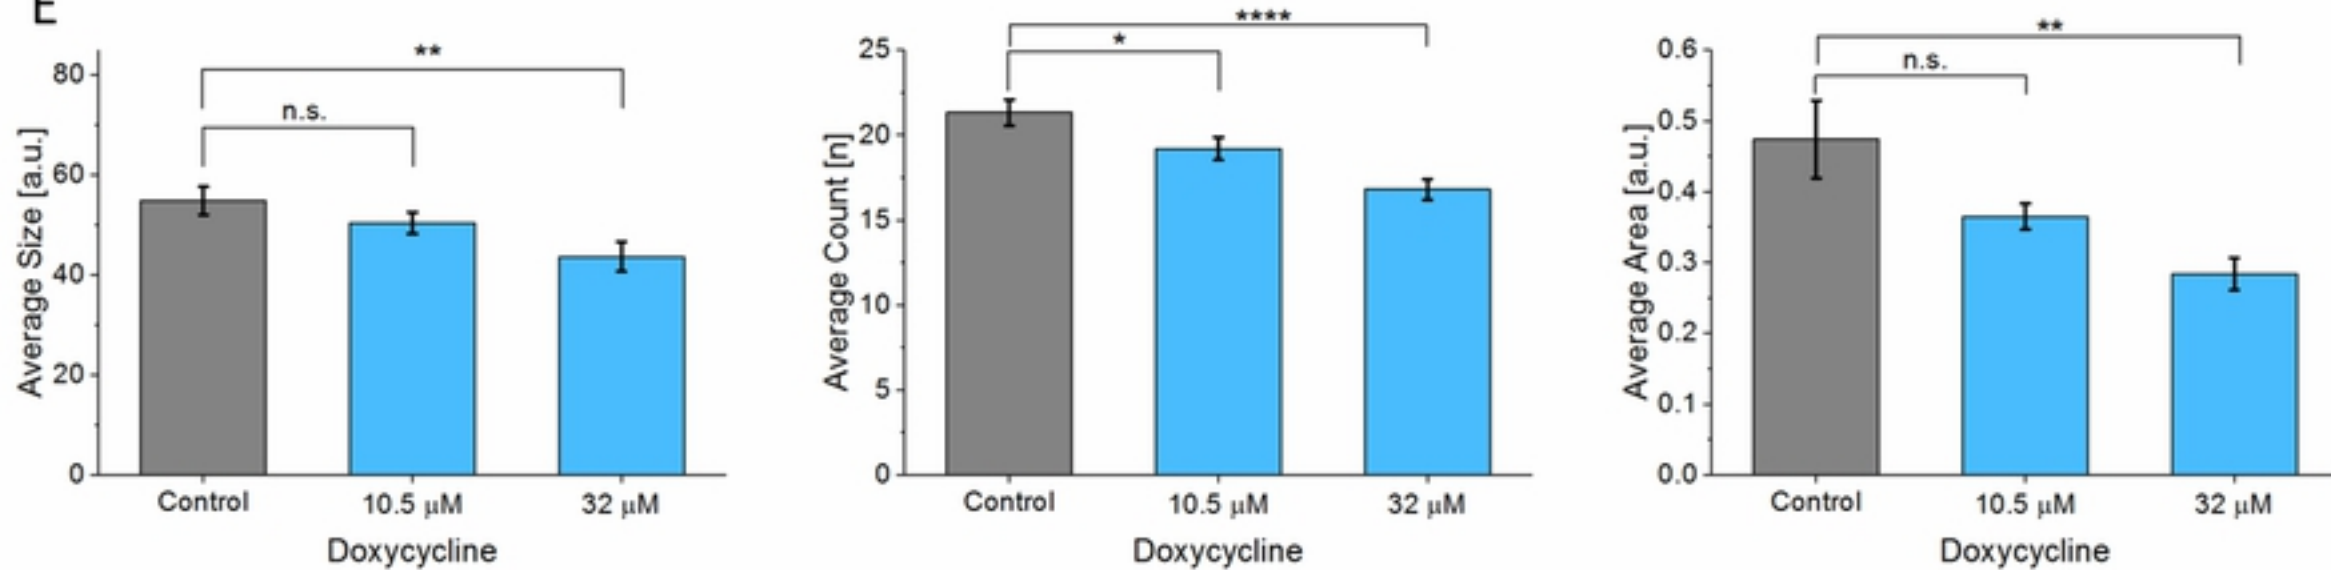

Fig5

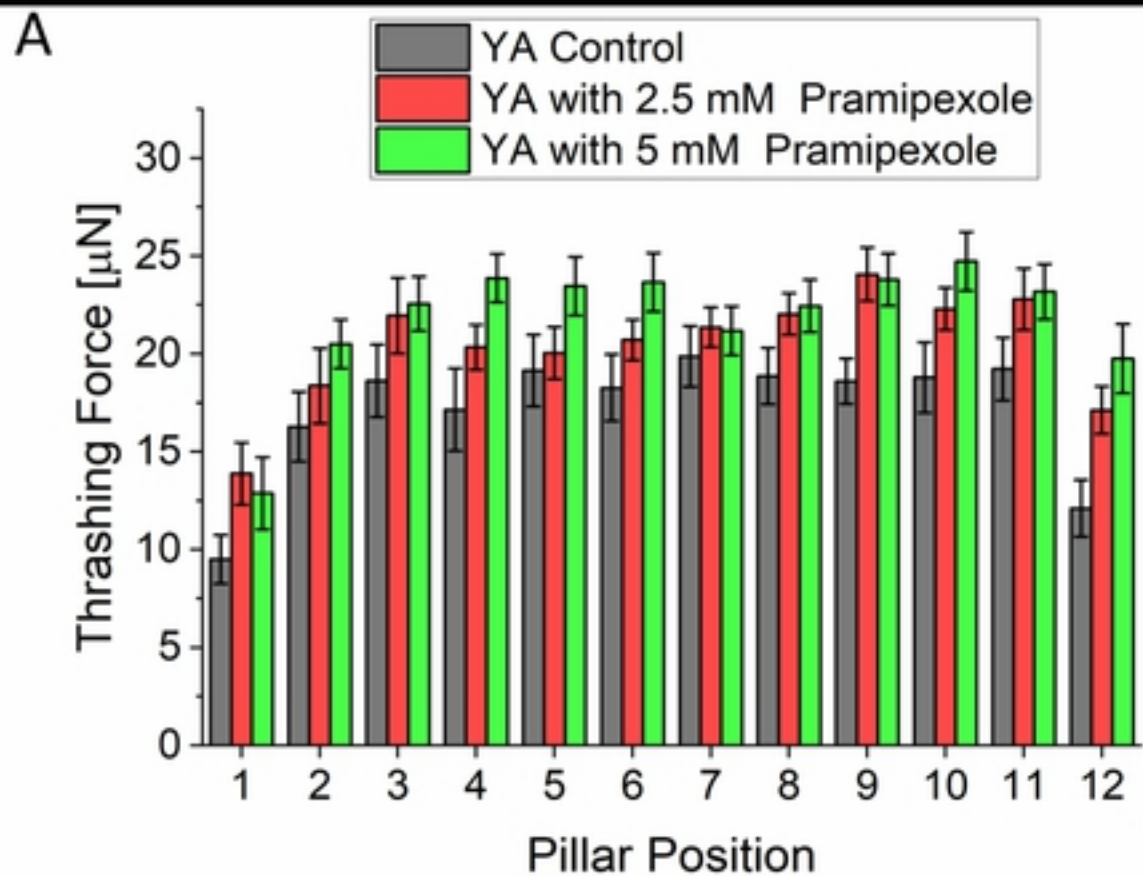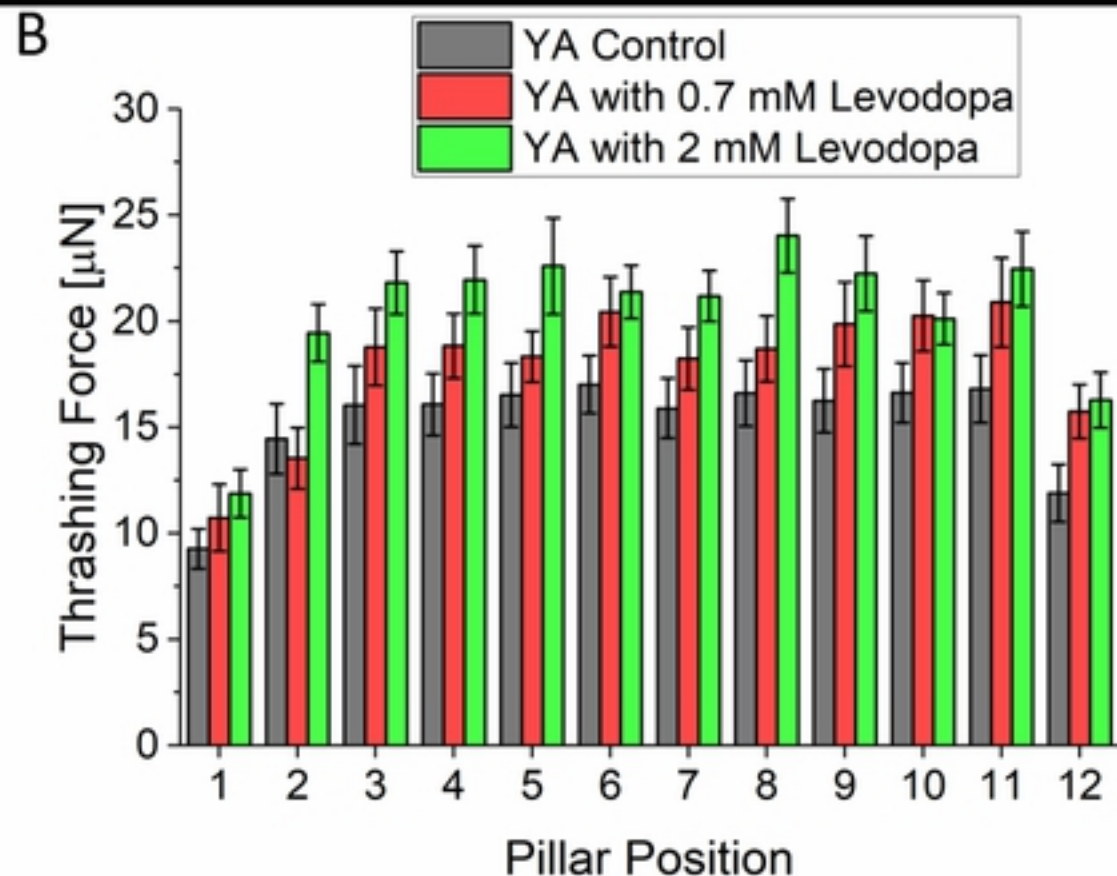

Fig6

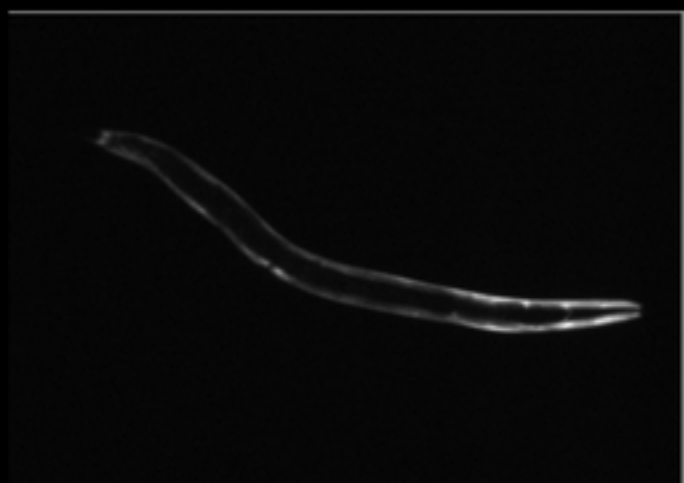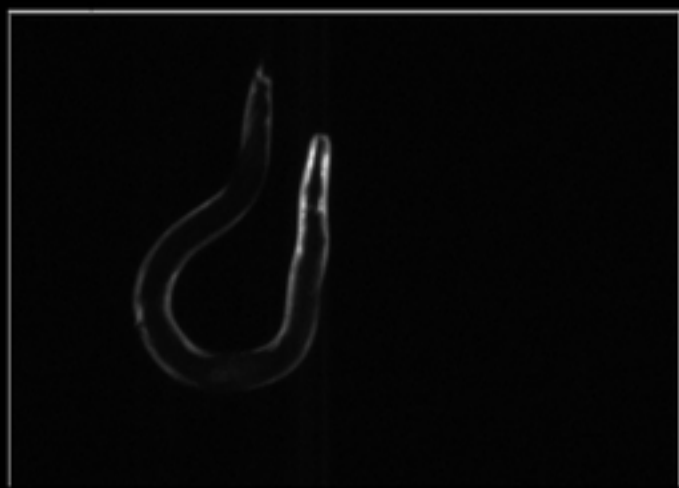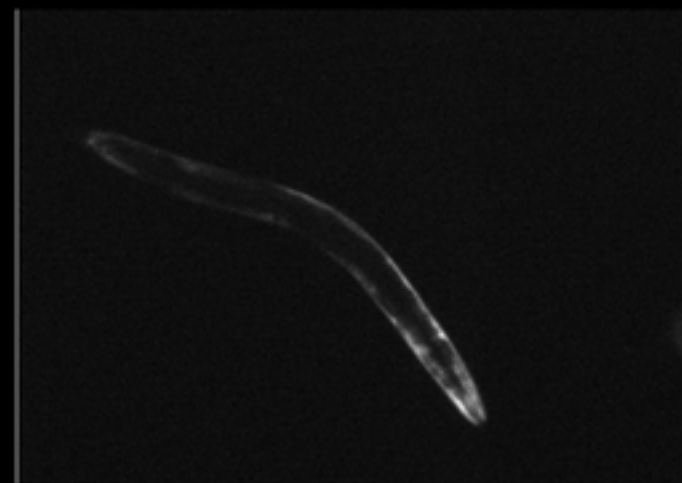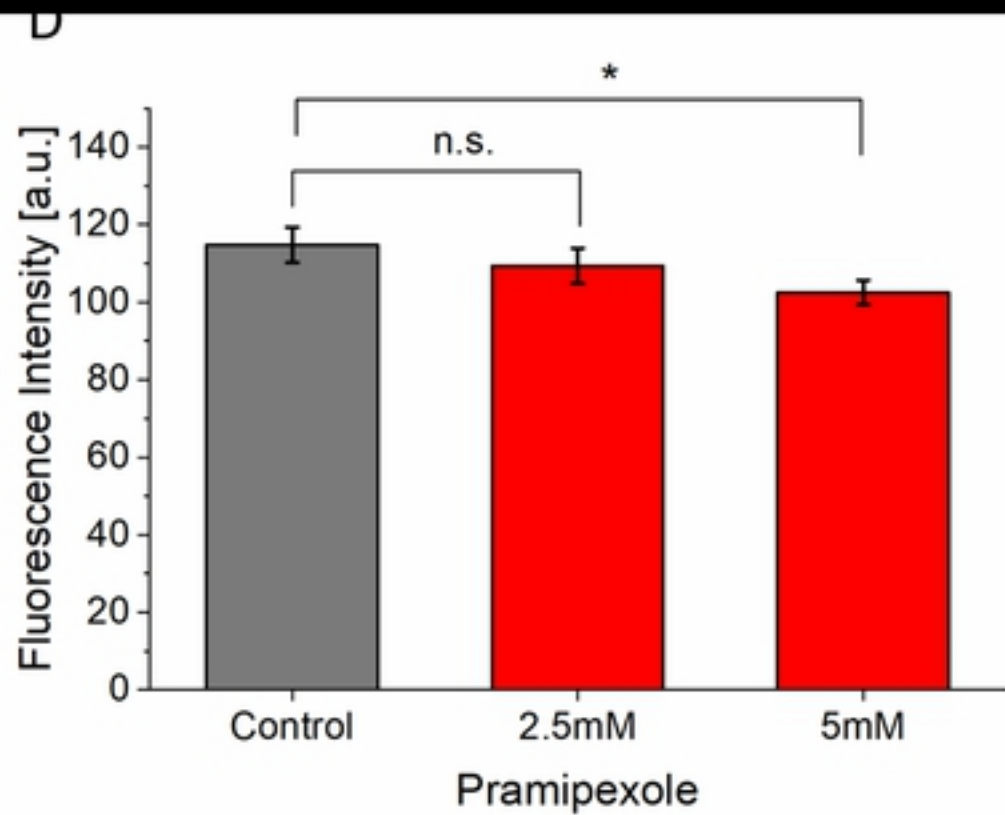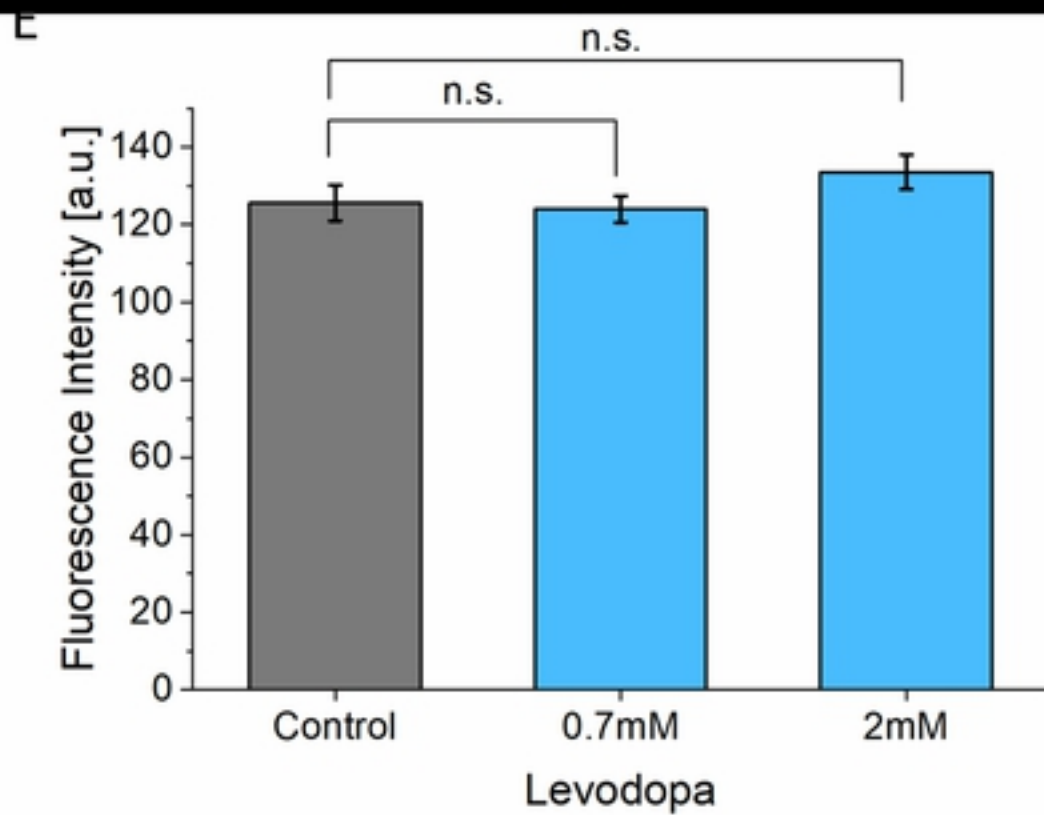

Fig7
